# Supplementary material for: Microbiome Composition and Function in Aquatic Vertebrates: Small Organisms Making Big Impacts on Aquatic Animal Health
Source: Front Microbiol. 2021 Mar 11;12:567408. doi: 10.3389/fmicb.2021.567408 (PMC7995652; doi:10.3389/fmicb.2021.567408)
Supplement: Supplementary file 2 [file Table_2.XLSX]

## Sheet: Sheet1
				Fish
Phlyum	Class	Genus	Tissue	Species	Habitat Salinity	Suggested Function / Indicator of health status	Method	Reference	Paper Citation Number
Proteobacteria	Betaproteobacteria	Nitrosomonas	Gills	Common carp (Cyprinus carpo)	Freshwater	Ammonia oxidation and denitrification	GC and targeted PCR of gills	van Kessel, M. A., Mesman, R. J., Arshad, A., Metz, J. R., Spanings, F. T., van Dalen, S. C., ... & Klaren, P. H. (2016). Branchial nitrogen cycle symbionts can remove ammonia in fish gills. Environmental microbiology reports, 8(5), 590-594.	33
Proteobacteria	Betaproteobacteria	Nitrosomonas	Gills	Zebrafish (Danio rerio)	Freshwater	Ammonia oxidation and denitrification	GC and targeted PCR of gills	van Kessel, M. A., Mesman, R. J., Arshad, A., Metz, J. R., Spanings, F. T., van Dalen, S. C., ... & Klaren, P. H. (2016). Branchial nitrogen cycle symbionts can remove ammonia in fish gills. Environmental microbiology reports, 8(5), 590-594.	33
Proteobacteria	Betaproteobacteria	Alcaligenes	Gills	Yellowtail Kingfish (Seriola lalandi)	Saltwater	Elevated in healthy fish	16S sequencing	Legrand, T. P., Catalano, S. R., Wos-Oxley, M. L., Stephens, F., Landos, M., Bansemer, M. S., ... & Oxley, A. (2018). The inner workings of the outer surface: skin and gill microbiota as indicators of changing gut health in yellowtail kingfish. Frontiers in microbiology, 8, 2664.	25
Proteobacteria	Gammaproteobacteria	Alteromonas	Gills	Yellowtail Kingfish (Seriola lalandi)	Saltwater	Elevated in diseased (enteritis) fish	16S sequencing	Legrand, T. P., Catalano, S. R., Wos-Oxley, M. L., Stephens, F., Landos, M., Bansemer, M. S., ... & Oxley, A. (2018). The inner workings of the outer surface: skin and gill microbiota as indicators of changing gut health in yellowtail kingfish. Frontiers in microbiology, 8, 2664.	25
Proteobacteria	Epsilonproteobacteria	Arcobacter	Gills	Yellowtail Kingfish (Seriola lalandi)	Saltwater	Elevated in diseased (enteritis) fish	16S sequencing	Legrand, T. P., Catalano, S. R., Wos-Oxley, M. L., Stephens, F., Landos, M., Bansemer, M. S., ... & Oxley, A. (2018). The inner workings of the outer surface: skin and gill microbiota as indicators of changing gut health in yellowtail kingfish. Frontiers in microbiology, 8, 2664.	25
Proteobacteria	Deltaproteobacteria	Desulfobacter	Gills	Yellowtail Kingfish (Seriola lalandi)	Saltwater	Elevated in diseased (enteritis) fish	16S sequencing	Legrand, T. P., Catalano, S. R., Wos-Oxley, M. L., Stephens, F., Landos, M., Bansemer, M. S., ... & Oxley, A. (2018). The inner workings of the outer surface: skin and gill microbiota as indicators of changing gut health in yellowtail kingfish. Frontiers in microbiology, 8, 2664.	25
Actinobacteria	Actinobacteria	Microcella	Gills	Yellowtail Kingfish (Seriola lalandi)	Saltwater	Elevated in diseased (enteritis) fish	16S sequencing	Legrand, T. P., Catalano, S. R., Wos-Oxley, M. L., Stephens, F., Landos, M., Bansemer, M. S., ... & Oxley, A. (2018). The inner workings of the outer surface: skin and gill microbiota as indicators of changing gut health in yellowtail kingfish. Frontiers in microbiology, 8, 2664.	25
Proteobacteria	Betaproteobacteria	Nitrosomonas	Gills	Yellowtail Kingfish (Seriola lalandi)	Saltwater	Enriched in gills	16S sequencing	Legrand, T. P., Catalano, S. R., Wos-Oxley, M. L., Stephens, F., Landos, M., Bansemer, M. S., ... & Oxley, A. (2018). The inner workings of the outer surface: skin and gill microbiota as indicators of changing gut health in yellowtail kingfish. Frontiers in microbiology, 8, 2664.	25
Proteobacteria	Alphaproteobacteria	Pelagibacter	Gills	Yellowtail Kingfish (Seriola lalandi)	Saltwater	Elevated in diseased (enteritis) fish	16S sequencing	Legrand, T. P., Catalano, S. R., Wos-Oxley, M. L., Stephens, F., Landos, M., Bansemer, M. S., ... & Oxley, A. (2018). The inner workings of the outer surface: skin and gill microbiota as indicators of changing gut health in yellowtail kingfish. Frontiers in microbiology, 8, 2664.	25
Proteobacteria	Betaproteobacteria	Polynucleobacter	Gills	Yellowtail Kingfish (Seriola lalandi)	Saltwater	Elevated in healthy fish	16S sequencing	Legrand, T. P., Catalano, S. R., Wos-Oxley, M. L., Stephens, F., Landos, M., Bansemer, M. S., ... & Oxley, A. (2018). The inner workings of the outer surface: skin and gill microbiota as indicators of changing gut health in yellowtail kingfish. Frontiers in microbiology, 8, 2664.	25
Proteobacteria	Gammaproteobacteria	Pseudospirillum	Gills	Yellowtail Kingfish (Seriola lalandi)	Saltwater	Elevated in diseased (enteritis) fish	16S sequencing	Legrand, T. P., Catalano, S. R., Wos-Oxley, M. L., Stephens, F., Landos, M., Bansemer, M. S., ... & Oxley, A. (2018). The inner workings of the outer surface: skin and gill microbiota as indicators of changing gut health in yellowtail kingfish. Frontiers in microbiology, 8, 2664.	25
Proteobacteria	Gammaproteobacteria	Psychrobacter	Gills	Yellowtail Kingfish (Seriola lalandi)	Saltwater	Elevated in healthy fish	16S sequencing	Legrand, T. P., Catalano, S. R., Wos-Oxley, M. L., Stephens, F., Landos, M., Bansemer, M. S., ... & Oxley, A. (2018). The inner workings of the outer surface: skin and gill microbiota as indicators of changing gut health in yellowtail kingfish. Frontiers in microbiology, 8, 2664.	25
Firmicutes	Bacilli	Salimicrobium	Gills	Yellowtail Kingfish (Seriola lalandi)	Saltwater	Elevated in healthy fish	16S sequencing	Legrand, T. P., Catalano, S. R., Wos-Oxley, M. L., Stephens, F., Landos, M., Bansemer, M. S., ... & Oxley, A. (2018). The inner workings of the outer surface: skin and gill microbiota as indicators of changing gut health in yellowtail kingfish. Frontiers in microbiology, 8, 2664.	25
Bacteroidetes	Flavobacteriia	Arcicella	Gills	Atlantic Salmon (Salmo salar)	Saltwater	Elevated in healthy fish	RT-DGGE Band Sequencing	Steinum, T., Sjåstad, K., Falk, K., Kvellestad, A., & Colquhoun, D. J. (2009). An RT PCR-DGGE survey of gill-associated bacteria in Norwegian Saltwater-reared Atlantic salmon suffering proliferative gill inflammation. Aquaculture, 293(3-4), 172-179.	26
Chlamydiae	Chlamydiae	Candidatus Piscichlamydia	Gills	Atlantic Salmon (Salmo salar)	Saltwater	Elevated in diseased (proliferative gill inflammation) fish	RT-DGGE Band Sequencing	Steinum, T., Sjåstad, K., Falk, K., Kvellestad, A., & Colquhoun, D. J. (2009). An RT PCR-DGGE survey of gill-associated bacteria in Norwegian Saltwater-reared Atlantic salmon suffering proliferative gill inflammation. Aquaculture, 293(3-4), 172-179.	26
Proteobacteria	Betaproteobacteria	Duganella	Gills	Atlantic Salmon (Salmo salar)	Saltwater	Elevated in healthy fish	RT-DGGE Band Sequencing	Steinum, T., Sjåstad, K., Falk, K., Kvellestad, A., & Colquhoun, D. J. (2009). An RT PCR-DGGE survey of gill-associated bacteria in Norwegian Saltwater-reared Atlantic salmon suffering proliferative gill inflammation. Aquaculture, 293(3-4), 172-179.	26
Proteobacteria	Gammaproteobacteria	Endozoicomonas	Gills	Atlantic Salmon (Salmo salar)	Saltwater	Elevated in diseased (proliferative gill inflammation) fish	RT-DGGE Band Sequencing	Steinum, T., Sjåstad, K., Falk, K., Kvellestad, A., & Colquhoun, D. J. (2009). An RT PCR-DGGE survey of gill-associated bacteria in Norwegian Saltwater-reared Atlantic salmon suffering proliferative gill inflammation. Aquaculture, 293(3-4), 172-179.	26
Bacteroidetes	Flavobacteriia	Flavobacterium	Gills	Atlantic Salmon (Salmo salar)	Saltwater	Elevated in diseased (proliferative gill inflammation) fish	RT-DGGE Band Sequencing	Steinum, T., Sjåstad, K., Falk, K., Kvellestad, A., & Colquhoun, D. J. (2009). An RT PCR-DGGE survey of gill-associated bacteria in Norwegian Saltwater-reared Atlantic salmon suffering proliferative gill inflammation. Aquaculture, 293(3-4), 172-179.	26
Proteobacteria	Gammaproteobacteria	Francisella	Gills	Atlantic Salmon (Salmo salar)	Saltwater	Elevated in diseased (proliferative gill inflammation) fish	RT-DGGE Band Sequencing	Steinum, T., Sjåstad, K., Falk, K., Kvellestad, A., & Colquhoun, D. J. (2009). An RT PCR-DGGE survey of gill-associated bacteria in Norwegian Saltwater-reared Atlantic salmon suffering proliferative gill inflammation. Aquaculture, 293(3-4), 172-179.	26
Bacteroidetes	Flavobacteriia	Krokinobacter	Gills	Atlantic Salmon (Salmo salar)	Saltwater	Elevated in diseased (proliferative gill inflammation) fish	RT-DGGE Band Sequencing	Steinum, T., Sjåstad, K., Falk, K., Kvellestad, A., & Colquhoun, D. J. (2009). An RT PCR-DGGE survey of gill-associated bacteria in Norwegian Saltwater-reared Atlantic salmon suffering proliferative gill inflammation. Aquaculture, 293(3-4), 172-179.	26
Cyanobacteria	Cyanophyceae	Phormidium	Gills	Atlantic Salmon (Salmo salar)	Saltwater	Elevated in healthy fish	RT-DGGE Band Sequencing	Steinum, T., Sjåstad, K., Falk, K., Kvellestad, A., & Colquhoun, D. J. (2009). An RT PCR-DGGE survey of gill-associated bacteria in Norwegian Saltwater-reared Atlantic salmon suffering proliferative gill inflammation. Aquaculture, 293(3-4), 172-179.	26
Proteobacteria	Gammaproteobacteria	Photobacterium	Gills	Atlantic Salmon (Salmo salar)	Saltwater	Elevated in healthy fish	RT-DGGE Band Sequencing	Steinum, T., Sjåstad, K., Falk, K., Kvellestad, A., & Colquhoun, D. J. (2009). An RT PCR-DGGE survey of gill-associated bacteria in Norwegian Saltwater-reared Atlantic salmon suffering proliferative gill inflammation. Aquaculture, 293(3-4), 172-179.	26
Proteobacteria	Betaproteobacteria	Polynucleobacter	Gills	Atlantic Salmon (Salmo salar)	Saltwater	Elevated in healthy fish	RT-DGGE Band Sequencing	Steinum, T., Sjåstad, K., Falk, K., Kvellestad, A., & Colquhoun, D. J. (2009). An RT PCR-DGGE survey of gill-associated bacteria in Norwegian Saltwater-reared Atlantic salmon suffering proliferative gill inflammation. Aquaculture, 293(3-4), 172-179.	26
Proteobacteria	Gammaproteobacteria	Pseudoalteromonas	Gills	Atlantic Salmon (Salmo salar)	Saltwater	Elevated in healthy fish	RT-DGGE Band Sequencing	Steinum, T., Sjåstad, K., Falk, K., Kvellestad, A., & Colquhoun, D. J. (2009). An RT PCR-DGGE survey of gill-associated bacteria in Norwegian Saltwater-reared Atlantic salmon suffering proliferative gill inflammation. Aquaculture, 293(3-4), 172-179.	26
Proteobacteria	Gammaproteobacteria	Pseudomonas	Gills	Atlantic Salmon (Salmo salar)	Saltwater	Elevated in diseased (proliferative gill inflammation) fish	RT-DGGE Band Sequencing	Steinum, T., Sjåstad, K., Falk, K., Kvellestad, A., & Colquhoun, D. J. (2009). An RT PCR-DGGE survey of gill-associated bacteria in Norwegian Saltwater-reared Atlantic salmon suffering proliferative gill inflammation. Aquaculture, 293(3-4), 172-179.	26
Proteobacteria	Gammaproteobacteria	Psychrobacter	Gills	Atlantic Salmon (Salmo salar)	Saltwater	Elevated in healthy fish	RT-DGGE Band Sequencing	Steinum, T., Sjåstad, K., Falk, K., Kvellestad, A., & Colquhoun, D. J. (2009). An RT PCR-DGGE survey of gill-associated bacteria in Norwegian Saltwater-reared Atlantic salmon suffering proliferative gill inflammation. Aquaculture, 293(3-4), 172-179.	26
Proteobacteria	Gammaproteobacteria	Salinisphaera	Gills	Atlantic Salmon (Salmo salar)	Saltwater	Elevated in diseased (proliferative gill inflammation) fish	RT-DGGE Band Sequencing	Steinum, T., Sjåstad, K., Falk, K., Kvellestad, A., & Colquhoun, D. J. (2009). An RT PCR-DGGE survey of gill-associated bacteria in Norwegian Saltwater-reared Atlantic salmon suffering proliferative gill inflammation. Aquaculture, 293(3-4), 172-179.	26
Proteobacteria	Gammaproteobacteria	Shewanella	Gills	Atlantic Salmon (Salmo salar)	Saltwater	Elevated in diseased (proliferative gill inflammation) fish	RT-DGGE Band Sequencing	Steinum, T., Sjåstad, K., Falk, K., Kvellestad, A., & Colquhoun, D. J. (2009). An RT PCR-DGGE survey of gill-associated bacteria in Norwegian Saltwater-reared Atlantic salmon suffering proliferative gill inflammation. Aquaculture, 293(3-4), 172-179.	26
Bacteroidetes	Flavobacteriia	Tenacibaculum	Gills	Atlantic Salmon (Salmo salar)	Saltwater	Elevated in diseased (proliferative gill inflammation) fish	RT-DGGE Band Sequencing	Steinum, T., Sjåstad, K., Falk, K., Kvellestad, A., & Colquhoun, D. J. (2009). An RT PCR-DGGE survey of gill-associated bacteria in Norwegian Saltwater-reared Atlantic salmon suffering proliferative gill inflammation. Aquaculture, 293(3-4), 172-179.	26
Proteobacteria	Betaproteobacteria	Undibacterium	Gills	Atlantic Salmon (Salmo salar)	Saltwater	Elevated in diseased (proliferative gill inflammation) fish	RT-DGGE Band Sequencing	Steinum, T., Sjåstad, K., Falk, K., Kvellestad, A., & Colquhoun, D. J. (2009). An RT PCR-DGGE survey of gill-associated bacteria in Norwegian Saltwater-reared Atlantic salmon suffering proliferative gill inflammation. Aquaculture, 293(3-4), 172-179.	26
Proteobacteria	Gammaproteobacteria	Vibrio	Gills	Atlantic Salmon (Salmo salar)	Saltwater	Elevated in healthy fish	RT-DGGE Band Sequencing	Steinum, T., Sjåstad, K., Falk, K., Kvellestad, A., & Colquhoun, D. J. (2009). An RT PCR-DGGE survey of gill-associated bacteria in Norwegian Saltwater-reared Atlantic salmon suffering proliferative gill inflammation. Aquaculture, 293(3-4), 172-179.	26
Actinobacteria	Actinobacteria	Arsenicicoccus	Gills	Clownfish (Amphiprion percula)	Saltwater	Elevated in suspended sediment-exposed fish	16S sequencing	Hess, S., Wenger, A. S., Ainsworth, T. D., & Rummer, J. L. (2015). Exposure of clownfish larvae to suspended sediment levels found on the Great Barrier Reef: impacts on gill structure and microbiome. Scientific reports, 5, 10561.	35
Firmicutes	Bacilli	Bacillus	Gills	Clownfish (Amphiprion percula)	Saltwater	Elevated in suspended sediment-exposed fish	16S sequencing	Hess, S., Wenger, A. S., Ainsworth, T. D., & Rummer, J. L. (2015). Exposure of clownfish larvae to suspended sediment levels found on the Great Barrier Reef: impacts on gill structure and microbiome. Scientific reports, 5, 10561.	35
Bacteroidetes	Flavobacteriia	Chryseobacterium	Gills	Clownfish (Amphiprion percula)	Saltwater	Elevated in suspended sediment-exposed fish	16S sequencing	Hess, S., Wenger, A. S., Ainsworth, T. D., & Rummer, J. L. (2015). Exposure of clownfish larvae to suspended sediment levels found on the Great Barrier Reef: impacts on gill structure and microbiome. Scientific reports, 5, 10561.	35
Actinobacteria	Actinobacteria	Corynebacterium	Gills	Clownfish (Amphiprion percula)	Saltwater	Elevated in suspended sediment-exposed fish	16S sequencing	Hess, S., Wenger, A. S., Ainsworth, T. D., & Rummer, J. L. (2015). Exposure of clownfish larvae to suspended sediment levels found on the Great Barrier Reef: impacts on gill structure and microbiome. Scientific reports, 5, 10561.	35
Proteobacteria	Gammaproteobacteria	Edwardsiella	Gills	Clownfish (Amphiprion percula)	Saltwater	Elevated in suspended sediment-exposed fish	16S sequencing	Hess, S., Wenger, A. S., Ainsworth, T. D., & Rummer, J. L. (2015). Exposure of clownfish larvae to suspended sediment levels found on the Great Barrier Reef: impacts on gill structure and microbiome. Scientific reports, 5, 10561.	35
Proteobacteria	Gammaproteobacteria	Idiomarina	Gills	Clownfish (Amphiprion percula)	Saltwater	Elevated in suspended sediment-exposed fish	16S sequencing	Hess, S., Wenger, A. S., Ainsworth, T. D., & Rummer, J. L. (2015). Exposure of clownfish larvae to suspended sediment levels found on the Great Barrier Reef: impacts on gill structure and microbiome. Scientific reports, 5, 10561.	35
Actinobacteria	Actinobacteria	Kocuria	Gills	Clownfish (Amphiprion percula)	Saltwater	Elevated in suspended sediment-exposed fish	16S sequencing	Hess, S., Wenger, A. S., Ainsworth, T. D., & Rummer, J. L. (2015). Exposure of clownfish larvae to suspended sediment levels found on the Great Barrier Reef: impacts on gill structure and microbiome. Scientific reports, 5, 10561.	35
Proteobacteria	Gammaproteobacteria	Marinomonas	Gills	Clownfish (Amphiprion percula)	Saltwater	Elevated in suspended sediment-exposed fish	16S sequencing	Hess, S., Wenger, A. S., Ainsworth, T. D., & Rummer, J. L. (2015). Exposure of clownfish larvae to suspended sediment levels found on the Great Barrier Reef: impacts on gill structure and microbiome. Scientific reports, 5, 10561.	35
Proteobacteria	Gammaproteobacteria	Pseudomonas	Gills	Clownfish (Amphiprion percula)	Saltwater	Elevated in suspended sediment-exposed fish	16S sequencing	Hess, S., Wenger, A. S., Ainsworth, T. D., & Rummer, J. L. (2015). Exposure of clownfish larvae to suspended sediment levels found on the Great Barrier Reef: impacts on gill structure and microbiome. Scientific reports, 5, 10561.	35
Proteobacteria	Alphaproteobacteria	Sphingomonas	Gills	Clownfish (Amphiprion percula)	Saltwater	Elevated in suspended sediment-exposed fish	16S sequencing	Hess, S., Wenger, A. S., Ainsworth, T. D., & Rummer, J. L. (2015). Exposure of clownfish larvae to suspended sediment levels found on the Great Barrier Reef: impacts on gill structure and microbiome. Scientific reports, 5, 10561.	35
Actinobacteria	Actinobacteria	Tessaracoccus	Gills	Clownfish (Amphiprion percula)	Saltwater	Elevated in suspended sediment-exposed fish	16S sequencing	Hess, S., Wenger, A. S., Ainsworth, T. D., & Rummer, J. L. (2015). Exposure of clownfish larvae to suspended sediment levels found on the Great Barrier Reef: impacts on gill structure and microbiome. Scientific reports, 5, 10561.	35
Spirochaetes	Spirochaetia	Brevinima	Intestine/Feces	Rainbow Trout (Oncorhynchus mykiss)	Freshwater	Elevated under high-density stocking conditions	16S sequencing	Brown, R. M., Wiens, G. D., & Salinas, I. (2019). Analysis of the gut and gill microbiome of resistant and susceptible lines of rainbow trout (Oncorhynchus mykiss). Fish & shellfish immunology, 86, 497-506.	32
Bacteroidetes	Sphingobacteriia	Hydrotalea	Intestine/Feces	Rainbow Trout (Oncorhynchus mykiss)	Freshwater	Elevated in F. psychrophilum-susceptible fish	16S sequencing	Brown, R. M., Wiens, G. D., & Salinas, I. (2019). Analysis of the gut and gill microbiome of resistant and susceptible lines of rainbow trout (Oncorhynchus mykiss). Fish & shellfish immunology, 86, 497-506.	32
Tenericutes	Mollicutes	Mycoplasma	Intestine/Feces	Rainbow Trout (Oncorhynchus mykiss)	Freshwater	Elevated in F. psychrophilum-resistant fish	16S sequencing	Brown, R. M., Wiens, G. D., & Salinas, I. (2019). Analysis of the gut and gill microbiome of resistant and susceptible lines of rainbow trout (Oncorhynchus mykiss). Fish & shellfish immunology, 86, 497-506.	32
Firmicutes	Bacillales	Paenibacillus	Intestine/Feces	Rainbow Trout (Oncorhynchus mykiss)	Freshwater	Elevated in F. psychrophilum-susceptible fish	16S sequencing	Brown, R. M., Wiens, G. D., & Salinas, I. (2019). Analysis of the gut and gill microbiome of resistant and susceptible lines of rainbow trout (Oncorhynchus mykiss). Fish & shellfish immunology, 86, 497-506.	32
Proteobacteria	Gammaproteobacteria	Shewanella	Intestine/Feces	Rainbow Trout (Oncorhynchus mykiss)	Freshwater	Elevated under high-density stocking conditions	16S sequencing	Brown, R. M., Wiens, G. D., & Salinas, I. (2019). Analysis of the gut and gill microbiome of resistant and susceptible lines of rainbow trout (Oncorhynchus mykiss). Fish & shellfish immunology, 86, 497-506.	32
Proteobacteria	Betaproteobacteria	Variovorax	Intestine/Feces	Rainbow Trout (Oncorhynchus mykiss)	Freshwater	Elevated in F. psychrophilum-susceptible fish	16S sequencing	Brown, R. M., Wiens, G. D., & Salinas, I. (2019). Analysis of the gut and gill microbiome of resistant and susceptible lines of rainbow trout (Oncorhynchus mykiss). Fish & shellfish immunology, 86, 497-506.	32
Proteobacteria	Gammaproteobacteria	Yersinia	Intestine/Feces	Brown Trout (Salmo trutta)	Freshwater	Inhibited in fish infected with T. bryosalmonae	16S sequencing of infected and non-infected fish	Vasemägi, A., Visse, M., & Kisand, V. (2017). Effect of environmental factors and an emerging parasitic disease on gut microbiome of wild salmonid fish. MSphere, 2(6).	55
Proteobacteria	Gammaproteobacteria	Acinetobacter	Intestine/Feces	Common Sole (Solea solea)	Freshwater	Produces chitinase	Review	Ray, A. K., Ghosh, K., & Ringø, E. (2012). Enzyme‐producing bacteria isolated from fish gut: a review. Aquaculture Nutrition, 18(5), 465-492.	58
Proteobacteria	Gammaproteobacteria	Aeromonas	Intestine/Feces	Grass Carp (Ctenopharyngodon idella)	Freshwater	Produces amylase, cellulase, protease, lipase	Review	Ray, A. K., Ghosh, K., & Ringø, E. (2012). Enzyme‐producing bacteria isolated from fish gut: a review. Aquaculture Nutrition, 18(5), 465-492.	58
Proteobacteria	Gammaproteobacteria	Aeromonas	Intestine/Feces	Ayu (Plecoglossus altivelis)	Freshwater	Produces amylase	Review	Ray, A. K., Ghosh, K., & Ringø, E. (2012). Enzyme‐producing bacteria isolated from fish gut: a review. Aquaculture Nutrition, 18(5), 465-492.	58
Proteobacteria	Gammaproteobacteria	Aeromonas	Intestine/Feces	Common Carp (Cyprinus carpo)	Freshwater	Produces amylase, chitinase	Review	Ray, A. K., Ghosh, K., & Ringø, E. (2012). Enzyme‐producing bacteria isolated from fish gut: a review. Aquaculture Nutrition, 18(5), 465-492.	58
Proteobacteria	Gammaproteobacteria	Aeromonas	Intestine/Feces	Channel Catfish (Ictalurus punctatus)	Freshwater	Produces amylase	Review	Ray, A. K., Ghosh, K., & Ringø, E. (2012). Enzyme‐producing bacteria isolated from fish gut: a review. Aquaculture Nutrition, 18(5), 465-492.	58
Proteobacteria	Gammaproteobacteria	Aeromonas	Intestine/Feces	Japanese Eel (Anguilla japonica)	Freshwater	Produces amylase	Review	Ray, A. K., Ghosh, K., & Ringø, E. (2012). Enzyme‐producing bacteria isolated from fish gut: a review. Aquaculture Nutrition, 18(5), 465-492.	58
Proteobacteria	Gammaproteobacteria	Aeromonas	Intestine/Feces	Nile Tilapia (Oreochromis niloticus)	Freshwater	Produces amylase, chitinase	Review	Ray, A. K., Ghosh, K., & Ringø, E. (2012). Enzyme‐producing bacteria isolated from fish gut: a review. Aquaculture Nutrition, 18(5), 465-492.	58
Proteobacteria	Gammaproteobacteria	Aeromonas	Intestine/Feces	Roach (Rutilus rutilus)	Freshwater	Produces amylase, protease	Review	Ray, A. K., Ghosh, K., & Ringø, E. (2012). Enzyme‐producing bacteria isolated from fish gut: a review. Aquaculture Nutrition, 18(5), 465-492.	58
Proteobacteria	Gammaproteobacteria	Aeromonas	Intestine/Feces	Crucian Carp (Carassius carassius)	Freshwater	Produces chitinase	Review	Ray, A. K., Ghosh, K., & Ringø, E. (2012). Enzyme‐producing bacteria isolated from fish gut: a review. Aquaculture Nutrition, 18(5), 465-492.	58
Firmicutes	Bacilli	Bacillus	Intestine/Feces	Rohu (Labeo rohita)	Freshwater	Produces amylase, cellulase, protease, phytase	Review	Ray, A. K., Ghosh, K., & Ringø, E. (2012). Enzyme‐producing bacteria isolated from fish gut: a review. Aquaculture Nutrition, 18(5), 465-492.	58
Firmicutes	Bacilli	Bacillus	Intestine/Feces	Bata (Labeo bata)	Freshwater	Produces amylase, cellulase, protease, phytase	Review	Ray, A. K., Ghosh, K., & Ringø, E. (2012). Enzyme‐producing bacteria isolated from fish gut: a review. Aquaculture Nutrition, 18(5), 465-492.	58
Firmicutes	Bacilli	Bacillus	Intestine/Feces	Catla (Catla catla)	Freshwater	Produces amylase, cellulase, protease, phytase	Review	Ray, A. K., Ghosh, K., & Ringø, E. (2012). Enzyme‐producing bacteria isolated from fish gut: a review. Aquaculture Nutrition, 18(5), 465-492.	58
Firmicutes	Bacilli	Bacillus	Intestine/Feces	White Carp (Cirrhinus mrigala)	Freshwater	Produces amylase, cellulase, protease, phytase	Review	Ray, A. K., Ghosh, K., & Ringø, E. (2012). Enzyme‐producing bacteria isolated from fish gut: a review. Aquaculture Nutrition, 18(5), 465-492.	58
Firmicutes	Bacilli	Bacillus	Intestine/Feces	Grass Carp (Ctenopharyngodon idella)	Freshwater	Produces cellulase, phytase	Review	Ray, A. K., Ghosh, K., & Ringø, E. (2012). Enzyme‐producing bacteria isolated from fish gut: a review. Aquaculture Nutrition, 18(5), 465-492.	58
Firmicutes	Bacilli	Bacillus	Intestine/Feces	Nile Tilapia (Oreochromis niloticus)	Freshwater	Produces cellulase, phytase	Review	Ray, A. K., Ghosh, K., & Ringø, E. (2012). Enzyme‐producing bacteria isolated from fish gut: a review. Aquaculture Nutrition, 18(5), 465-492.	58
Firmicutes	Bacilli	Bacillus	Intestine/Feces	Pacu (Piaractus mesopotamicus)	Freshwater	Produces cellulase	Review	Ray, A. K., Ghosh, K., & Ringø, E. (2012). Enzyme‐producing bacteria isolated from fish gut: a review. Aquaculture Nutrition, 18(5), 465-492.	58
Firmicutes	Bacilli	Bacillus	Intestine/Feces	Three Spot Leporinus (Leporinus friderici)	Freshwater	Produces cellulase	Review	Ray, A. K., Ghosh, K., & Ringø, E. (2012). Enzyme‐producing bacteria isolated from fish gut: a review. Aquaculture Nutrition, 18(5), 465-492.	58
Firmicutes	Bacilli	Bacillus	Intestine/Feces	Kalbasu (Labeo calbasu)	Freshwater	Produces phytase	Review	Ray, A. K., Ghosh, K., & Ringø, E. (2012). Enzyme‐producing bacteria isolated from fish gut: a review. Aquaculture Nutrition, 18(5), 465-492.	58
Firmicutes	Bacilli	Bacillus	Intestine/Feces	Climbing Perch (Anabas testudineus )	Freshwater	Produces phytase	Review	Ray, A. K., Ghosh, K., & Ringø, E. (2012). Enzyme‐producing bacteria isolated from fish gut: a review. Aquaculture Nutrition, 18(5), 465-492.	58
Firmicutes	Bacilli	Bacillus	Intestine/Feces	Common carp (Cyprinus carpo)	Freshwater	Produces phytase	Review	Ray, A. K., Ghosh, K., & Ringø, E. (2012). Enzyme‐producing bacteria isolated from fish gut: a review. Aquaculture Nutrition, 18(5), 465-492.	58
Firmicutes	Bacilli	Bacillus	Intestine/Feces	Silver Carp (Hypophthalmichthys molitrix)	Freshwater	Produces phytase	Review	Ray, A. K., Ghosh, K., & Ringø, E. (2012). Enzyme‐producing bacteria isolated from fish gut: a review. Aquaculture Nutrition, 18(5), 465-492.	58
Firmicutes	Bacilli	Bacillus	Intestine/Feces	Mrigral Carp (Cirrhinus cirrhosus)	Freshwater	Produces phytase	Review	Ray, A. K., Ghosh, K., & Ringø, E. (2012). Enzyme‐producing bacteria isolated from fish gut: a review. Aquaculture Nutrition, 18(5), 465-492.	58
Firmicutes	Bacilli	Bacillus	Intestine/Feces	Orangefin Labeo (Labeo calbasu)	Freshwater	Produces phytase	Review	Ray, A. K., Ghosh, K., & Ringø, E. (2012). Enzyme‐producing bacteria isolated from fish gut: a review. Aquaculture Nutrition, 18(5), 465-492.	58
Firmicutes	Bacilli	Bacillus	Intestine/Feces	Pool Barb (Puntius sophore)	Freshwater	Produces phytase	Review	Ray, A. K., Ghosh, K., & Ringø, E. (2012). Enzyme‐producing bacteria isolated from fish gut: a review. Aquaculture Nutrition, 18(5), 465-492.	58
Firmicutes	Bacilli	Bacillus	Intestine/Feces	Striped Dwarf Catfish (Mystus vittatus)	Freshwater	Produces phytase	Review	Ray, A. K., Ghosh, K., & Ringø, E. (2012). Enzyme‐producing bacteria isolated from fish gut: a review. Aquaculture Nutrition, 18(5), 465-492.	58
Firmicutes	Bacilli	Bacillus	Intestine/Feces	Stinging Catfish (Heteropneustes fossilis)	Freshwater	Produces phytase	Review	Ray, A. K., Ghosh, K., & Ringø, E. (2012). Enzyme‐producing bacteria isolated from fish gut: a review. Aquaculture Nutrition, 18(5), 465-492.	58
Firmicutes	Bacilli	Bacillus	Intestine/Feces	Indian River Shad (Gudusia chapra)	Freshwater	Produces phytase	Review	Ray, A. K., Ghosh, K., & Ringø, E. (2012). Enzyme‐producing bacteria isolated from fish gut: a review. Aquaculture Nutrition, 18(5), 465-492.	58
Firmicutes	Bacilli	Bacillus	Intestine/Feces	Spotted Snakehead (Channa punctata)	Freshwater	Produces phytase	Review	Ray, A. K., Ghosh, K., & Ringø, E. (2012). Enzyme‐producing bacteria isolated from fish gut: a review. Aquaculture Nutrition, 18(5), 465-492.	58
Ascomycota	Saccharomycetes	Candida	Intestine/Feces	Mrigral Carp (Cirrhinus cirrhosus)	Freshwater	Produces tannase	Review	Ray, A. K., Ghosh, K., & Ringø, E. (2012). Enzyme‐producing bacteria isolated from fish gut: a review. Aquaculture Nutrition, 18(5), 465-492.	58
Ascomycota	Saccharomycetes	Candida	Intestine/Feces	Nile Tilapia (Oreochromis niloticus)	Freshwater	Produces tannase	Review	Ray, A. K., Ghosh, K., & Ringø, E. (2012). Enzyme‐producing bacteria isolated from fish gut: a review. Aquaculture Nutrition, 18(5), 465-492.	58
Ascomycota	Saccharomycetes	Candida	Intestine/Feces	Rohu (Labeo rohita)	Freshwater	Produces tannase	Review	Ray, A. K., Ghosh, K., & Ringø, E. (2012). Enzyme‐producing bacteria isolated from fish gut: a review. Aquaculture Nutrition, 18(5), 465-492.	58
Proteobacteria	Gammaproteobacteria	Citrobacter	Intestine/Feces	Catla (Catla catla)	Freshwater	Produces amylase, cellulase, protease	Review	Ray, A. K., Ghosh, K., & Ringø, E. (2012). Enzyme‐producing bacteria isolated from fish gut: a review. Aquaculture Nutrition, 18(5), 465-492.	58
Proteobacteria	Gammaproteobacteria	Citrobacter	Intestine/Feces	White Carp (Cirrhinus mrigala)	Freshwater	Produces amylase, cellulase, protease	Review	Ray, A. K., Ghosh, K., & Ringø, E. (2012). Enzyme‐producing bacteria isolated from fish gut: a review. Aquaculture Nutrition, 18(5), 465-492.	58
Firmicutes	Clostridia	Clostridium	Intestine/Feces	Ayu (Plecoglossus altivelis)	Freshwater	Produces amylase	Review	Ray, A. K., Ghosh, K., & Ringø, E. (2012). Enzyme‐producing bacteria isolated from fish gut: a review. Aquaculture Nutrition, 18(5), 465-492.	58
Firmicutes	Clostridia	Clostridium	Intestine/Feces	Common Carp (Cyprinus carpo)	Freshwater	Produces amylase	Review	Ray, A. K., Ghosh, K., & Ringø, E. (2012). Enzyme‐producing bacteria isolated from fish gut: a review. Aquaculture Nutrition, 18(5), 465-492.	58
Firmicutes	Clostridia	Clostridium	Intestine/Feces	Channel Catfish (Ictalurus punctatus)	Freshwater	Produces amylase	Review	Ray, A. K., Ghosh, K., & Ringø, E. (2012). Enzyme‐producing bacteria isolated from fish gut: a review. Aquaculture Nutrition, 18(5), 465-492.	58
Firmicutes	Clostridia	Clostridium	Intestine/Feces	Japanese Eel (Anguilla japonica)	Freshwater	Produces amylase	Review	Ray, A. K., Ghosh, K., & Ringø, E. (2012). Enzyme‐producing bacteria isolated from fish gut: a review. Aquaculture Nutrition, 18(5), 465-492.	58
Firmicutes	Clostridia	Clostridium	Intestine/Feces	Tilapia (Oreochromis niloticus)	Freshwater	Produces amylase	Review	Ray, A. K., Ghosh, K., & Ringø, E. (2012). Enzyme‐producing bacteria isolated from fish gut: a review. Aquaculture Nutrition, 18(5), 465-492.	58
Proteobacteria	Gammaproteobacteria	Enterobacter	Intestine/Feces	Rohu (Labeo rohita)	Freshwater	Produces tannase	Review	Ray, A. K., Ghosh, K., & Ringø, E. (2012). Enzyme‐producing bacteria isolated from fish gut: a review. Aquaculture Nutrition, 18(5), 465-492.	58
Proteobacteria	Gammaproteobacteria	Enterobacter	Intestine/Feces	Catla (Catla catla)	Freshwater	Produces amylase, cellulase, protease	Review	Ray, A. K., Ghosh, K., & Ringø, E. (2012). Enzyme‐producing bacteria isolated from fish gut: a review. Aquaculture Nutrition, 18(5), 465-492.	58
Bacteroidetes	Flavobacteriia	Flavobacterium	Intestine/Feces	Roach (Rutilus rutilus)	Freshwater	Produces amylase, protease	Review	Ray, A. K., Ghosh, K., & Ringø, E. (2012). Enzyme‐producing bacteria isolated from fish gut: a review. Aquaculture Nutrition, 18(5), 465-492.	58
Bacteroidetes	Flavobacteriia	Flavobacterium	Intestine/Feces	Common Sole (Solea solea)	Freshwater	Produces chitinase	Review	Ray, A. K., Ghosh, K., & Ringø, E. (2012). Enzyme‐producing bacteria isolated from fish gut: a review. Aquaculture Nutrition, 18(5), 465-492.	58
Actinobacteria	Actinobacteria	Micrococcus	Intestine/Feces	Roach (Rutilus rutilus)	Freshwater	Produces protease	Review	Ray, A. K., Ghosh, K., & Ringø, E. (2012). Enzyme‐producing bacteria isolated from fish gut: a review. Aquaculture Nutrition, 18(5), 465-492.	58
Proteobacteria	Gammaproteobacteria	Photobacterium	Intestine/Feces	Common Sole (Solea solea)	Freshwater	Produces chitinase	Review	Ray, A. K., Ghosh, K., & Ringø, E. (2012). Enzyme‐producing bacteria isolated from fish gut: a review. Aquaculture Nutrition, 18(5), 465-492.	58
Ascomycota	Saccharomycetes	Pichia	Intestine/Feces	Mrigral Carp (Cirrhinus cirrhosus)	Freshwater	Produces tannase	Review	Ray, A. K., Ghosh, K., & Ringø, E. (2012). Enzyme‐producing bacteria isolated from fish gut: a review. Aquaculture Nutrition, 18(5), 465-492.	58
Ascomycota	Saccharomycetes	Pichia	Intestine/Feces	Nile Tilapia (Oreochromis niloticus)	Freshwater	Produces tannase	Review	Ray, A. K., Ghosh, K., & Ringø, E. (2012). Enzyme‐producing bacteria isolated from fish gut: a review. Aquaculture Nutrition, 18(5), 465-492.	58
Ascomycota	Saccharomycetes	Pichia	Intestine/Feces	Rohu (Labeo rohita)	Freshwater	Produces tannase	Review	Ray, A. K., Ghosh, K., & Ringø, E. (2012). Enzyme‐producing bacteria isolated from fish gut: a review. Aquaculture Nutrition, 18(5), 465-492.	58
Proteobacteria	Gammaproteobacteria	Plesiomonas	Intestine/Feces	Nile Tilapia (Oreochromis niloticus)	Freshwater	Produces chitinase	Review	Ray, A. K., Ghosh, K., & Ringø, E. (2012). Enzyme‐producing bacteria isolated from fish gut: a review. Aquaculture Nutrition, 18(5), 465-492.	58
Proteobacteria	Gammaproteobacteria	Pseudomonas	Intestine/Feces	Roach (Rutilus rutilus)	Freshwater	Produces amylase, protease	Review	Ray, A. K., Ghosh, K., & Ringø, E. (2012). Enzyme‐producing bacteria isolated from fish gut: a review. Aquaculture Nutrition, 18(5), 465-492.	58
Actinobacteria	Actinobacteria	Rhodococcus	Intestine/Feces	Catla (Catla catla)	Freshwater	Produces phytase	Review	Ray, A. K., Ghosh, K., & Ringø, E. (2012). Enzyme‐producing bacteria isolated from fish gut: a review. Aquaculture Nutrition, 18(5), 465-492.	58
Proteobacteria	Gammaproteobacteria	Vibrio	Intestine/Feces	Nile Tilapia (Oreochromis niloticus)	Freshwater	Produces chitinase	Review	Ray, A. K., Ghosh, K., & Ringø, E. (2012). Enzyme‐producing bacteria isolated from fish gut: a review. Aquaculture Nutrition, 18(5), 465-492.	58
Proteobacteria	Gammaproteobacteria	Vibrio	Intestine/Feces	Common Sole (Solea solea)	Freshwater	Produces chitinase	Review	Ray, A. K., Ghosh, K., & Ringø, E. (2012). Enzyme‐producing bacteria isolated from fish gut: a review. Aquaculture Nutrition, 18(5), 465-492.	58
Fusobacteria	Fusobacteriia	Cetobacterium	Intestine/Feces	Zebrafish (Danio rerio)	Freshwater	Elevated in treated fish | mediate inflammation and metabolic rate	16S sequencing of control and nucleotide-fed fish	Guo, X., Ran, C., Zhang, Z., He, S., Jin, M., & Zhou, Z. (2017). The growth-promoting effect of dietary nucleotides in fish is associated with an intestinal microbiota-mediated reduction in energy expenditure. The Journal of Nutrition, 147(5), 781-788.	61
Firmicutes	Clostridia	Clostridium	Intestine/Feces	Zebrafish (Danio rerio)	Freshwater	Decreased in treated fish | mediate inflammation and metabolic rate	16S sequencing of control and nucleotide-fed fish	Guo, X., Ran, C., Zhang, Z., He, S., Jin, M., & Zhou, Z. (2017). The growth-promoting effect of dietary nucleotides in fish is associated with an intestinal microbiota-mediated reduction in energy expenditure. The Journal of Nutrition, 147(5), 781-788.	61
Proteobacteria	Alphaproteobacteria	Mesorhizobium	Intestine/Feces	Zebrafish (Danio rerio)	Freshwater	Elevated in treated fish | mediate inflammation and metabolic rate	16S sequencing of control and nucleotide-fed fish	Guo, X., Ran, C., Zhang, Z., He, S., Jin, M., & Zhou, Z. (2017). The growth-promoting effect of dietary nucleotides in fish is associated with an intestinal microbiota-mediated reduction in energy expenditure. The Journal of Nutrition, 147(5), 781-788.	61
Bacteroidetes	Bacteroidetes	Prevotella	Intestine/Feces	Zebrafish (Danio rerio)	Freshwater	Elevated in treated fish | mediate inflammation and metabolic rate	16S sequencing of control and nucleotide-fed fish	Guo, X., Ran, C., Zhang, Z., He, S., Jin, M., & Zhou, Z. (2017). The growth-promoting effect of dietary nucleotides in fish is associated with an intestinal microbiota-mediated reduction in energy expenditure. The Journal of Nutrition, 147(5), 781-788.	61
Proteobacteria	Betaproteobacteria	Thauera	Intestine/Feces	Zebrafish (Danio rerio)	Freshwater	Elevated in treated fish | mediate inflammation and metabolic rate	16S sequencing of control and nucleotide-fed fish	Guo, X., Ran, C., Zhang, Z., He, S., Jin, M., & Zhou, Z. (2017). The growth-promoting effect of dietary nucleotides in fish is associated with an intestinal microbiota-mediated reduction in energy expenditure. The Journal of Nutrition, 147(5), 781-788.	61
Firmicutes	Negativicutes	Veillonella	Intestine/Feces	Zebrafish (Danio rerio)	Freshwater	Elevated in treated fish | mediate inflammation and metabolic rate	16S sequencing of control and nucleotide-fed fish	Guo, X., Ran, C., Zhang, Z., He, S., Jin, M., & Zhou, Z. (2017). The growth-promoting effect of dietary nucleotides in fish is associated with an intestinal microbiota-mediated reduction in energy expenditure. The Journal of Nutrition, 147(5), 781-788.	61
Proteobacteria	Gammaproteobacteria	Acinetobacter	Intestine/Feces	Atlantic Salmon (Salmo salar)	Freshwater/Saltwater	Produces amylase, cellulase, protease, lipase, phytase, chitinase	Review	Ray, A. K., Ghosh, K., & Ringø, E. (2012). Enzyme‐producing bacteria isolated from fish gut: a review. Aquaculture Nutrition, 18(5), 465-492.	58
Proteobacteria	Alphaproteobacteria	Agrobacterium	Intestine/Feces	Arctic charr (Salvelinus alpinus)	Freshwater/Saltwater	Produces lipase	Review	Ray, A. K., Ghosh, K., & Ringø, E. (2012). Enzyme‐producing bacteria isolated from fish gut: a review. Aquaculture Nutrition, 18(5), 465-492.	58
Firmicutes	Bacilli	Bacillus	Intestine/Feces	Atlantic Salmon (Salmo salar)	Freshwater/Saltwater	Produces amylase, cellulase, protease, lipase, phytase, chitinase	Review	Ray, A. K., Ghosh, K., & Ringø, E. (2012). Enzyme‐producing bacteria isolated from fish gut: a review. Aquaculture Nutrition, 18(5), 465-492.	58
Actinobacteria	Actinobacteria	Brevibacterium	Intestine/Feces	Arctic charr (Salvelinus alpinus)	Freshwater/Saltwater	Produces lipase	Review	Ray, A. K., Ghosh, K., & Ringø, E. (2012). Enzyme‐producing bacteria isolated from fish gut: a review. Aquaculture Nutrition, 18(5), 465-492.	58
Actinobacteria	Actinobacteria	Microbacterium	Intestine/Feces	Arctic charr (Salvelinus alpinus)	Freshwater/Saltwater	Produces lipase	Review	Ray, A. K., Ghosh, K., & Ringø, E. (2012). Enzyme‐producing bacteria isolated from fish gut: a review. Aquaculture Nutrition, 18(5), 465-492.	58
Proteobacteria	Gammaproteobacteria	Pseudomonas	Intestine/Feces	Arctic charr (Salvelinus alpinus)	Freshwater/Saltwater	Produces lipase	Review	Ray, A. K., Ghosh, K., & Ringø, E. (2012). Enzyme‐producing bacteria isolated from fish gut: a review. Aquaculture Nutrition, 18(5), 465-492.	58
Firmicutes	Bacilli	Staphylococcus	Intestine/Feces	Arctic charr (Salvelinus alpinus)	Freshwater/Saltwater	Produces lipase	Review	Ray, A. K., Ghosh, K., & Ringø, E. (2012). Enzyme‐producing bacteria isolated from fish gut: a review. Aquaculture Nutrition, 18(5), 465-492.	58
Proteobacteria	Gammaproteobacteria	Vibrio	Intestine/Feces	Arctic charr (Salvelinus alpinus)	Freshwater/Saltwater	Produces lipase	Review	Ray, A. K., Ghosh, K., & Ringø, E. (2012). Enzyme‐producing bacteria isolated from fish gut: a review. Aquaculture Nutrition, 18(5), 465-492.	58
Proteobacteria	Gammaproteobacteria	Acinetobacter	Intestine/Feces	Sea Bass (Dicentrarchus labrax)	Saltwater	Produces lipase	Review	Ray, A. K., Ghosh, K., & Ringø, E. (2012). Enzyme‐producing bacteria isolated from fish gut: a review. Aquaculture Nutrition, 18(5), 465-492.	58
Proteobacteria	Gammaproteobacteria	Acinetobacter	Intestine/Feces	Flathead Grey Mullet (Mugil cephalus)	Saltwater	Produces protease	Review	Ray, A. K., Ghosh, K., & Ringø, E. (2012). Enzyme‐producing bacteria isolated from fish gut: a review. Aquaculture Nutrition, 18(5), 465-492.	58
Proteobacteria	Gammaproteobacteria	Aeromonas	Intestine/Feces	Flathead Grey Mullet (Mugil cephalus)	Saltwater	Produces protease, chitinase	Review	Ray, A. K., Ghosh, K., & Ringø, E. (2012). Enzyme‐producing bacteria isolated from fish gut: a review. Aquaculture Nutrition, 18(5), 465-492.	58
Firmicutes	Bacilli	Bacillus	Intestine/Feces	Flathead Grey Mullet (Mugil cephalus)	Saltwater	Produces protease	Review	Ray, A. K., Ghosh, K., & Ringø, E. (2012). Enzyme‐producing bacteria isolated from fish gut: a review. Aquaculture Nutrition, 18(5), 465-492.	58
Firmicutes	Bacilli	Brochothrix	Intestine/Feces	Atlantic Cod (Gadus morhua)	Saltwater	Produces amylase, cellulase, protease, lipase, phytase, chitinase	Review	Ray, A. K., Ghosh, K., & Ringø, E. (2012). Enzyme‐producing bacteria isolated from fish gut: a review. Aquaculture Nutrition, 18(5), 465-492.	58
Proteobacteria	Gammaproteobacteria	Enterobacter	Intestine/Feces	Flathead Grey Mullet (Mugil cephalus)	Saltwater	Produces protease, chitinase	Review	Ray, A. K., Ghosh, K., & Ringø, E. (2012). Enzyme‐producing bacteria isolated from fish gut: a review. Aquaculture Nutrition, 18(5), 465-492.	58
Proteobacteria	Gammaproteobacteria	Ferrimonas	Intestine/Feces	Brown-Lined Puffer (Canthigaster rivulata)	Saltwater	Produces chitinase	Review	Ray, A. K., Ghosh, K., & Ringø, E. (2012). Enzyme‐producing bacteria isolated from fish gut: a review. Aquaculture Nutrition, 18(5), 465-492.	58
Proteobacteria	Gammaproteobacteria	Ferrimonas	Intestine/Feces	Sea Chub (Girella leonina)	Saltwater	Produces chitinase	Review	Ray, A. K., Ghosh, K., & Ringø, E. (2012). Enzyme‐producing bacteria isolated from fish gut: a review. Aquaculture Nutrition, 18(5), 465-492.	58
Proteobacteria	Gammaproteobacteria	Ferrimonas	Intestine/Feces	Smallscale Blackfish (Girella punctata)	Saltwater	Produces chitinase	Review	Ray, A. K., Ghosh, K., & Ringø, E. (2012). Enzyme‐producing bacteria isolated from fish gut: a review. Aquaculture Nutrition, 18(5), 465-492.	58
Proteobacteria	Gammaproteobacteria	Ferrimonas	Intestine/Feces	Morwong (Goniistius zonatus)	Saltwater	Produces chitinase	Review	Ray, A. K., Ghosh, K., & Ringø, E. (2012). Enzyme‐producing bacteria isolated from fish gut: a review. Aquaculture Nutrition, 18(5), 465-492.	58
Proteobacteria	Gammaproteobacteria	Ferrimonas	Intestine/Feces	Kidako Moray (Gymnothorax kidako)	Saltwater	Produces chitinase	Review	Ray, A. K., Ghosh, K., & Ringø, E. (2012). Enzyme‐producing bacteria isolated from fish gut: a review. Aquaculture Nutrition, 18(5), 465-492.	58
Proteobacteria	Gammaproteobacteria	Ferrimonas	Intestine/Feces	Stripey (Microcanthus strigatus)	Saltwater	Produces chitinase	Review	Ray, A. K., Ghosh, K., & Ringø, E. (2012). Enzyme‐producing bacteria isolated from fish gut: a review. Aquaculture Nutrition, 18(5), 465-492.	58
Proteobacteria	Gammaproteobacteria	Ferrimonas	Intestine/Feces	Rainbow Wrasse (Parajulis poecilepterus)	Saltwater	Produces chitinase	Review	Ray, A. K., Ghosh, K., & Ringø, E. (2012). Enzyme‐producing bacteria isolated from fish gut: a review. Aquaculture Nutrition, 18(5), 465-492.	58
Proteobacteria	Gammaproteobacteria	Ferrimonas	Intestine/Feces	White Trevally (Pseudocaranx dentex)	Saltwater	Produces chitinase	Review	Ray, A. K., Ghosh, K., & Ringø, E. (2012). Enzyme‐producing bacteria isolated from fish gut: a review. Aquaculture Nutrition, 18(5), 465-492.	58
Proteobacteria	Gammaproteobacteria	Ferrimonas	Intestine/Feces	Wrasse (Pseudolabrus sieboldi)	Saltwater	Produces chitinase	Review	Ray, A. K., Ghosh, K., & Ringø, E. (2012). Enzyme‐producing bacteria isolated from fish gut: a review. Aquaculture Nutrition, 18(5), 465-492.	58
Proteobacteria	Gammaproteobacteria	Ferrimonas	Intestine/Feces	Cocktail Wrasse (Pteragogus flagellifer)	Saltwater	Produces chitinase	Review	Ray, A. K., Ghosh, K., & Ringø, E. (2012). Enzyme‐producing bacteria isolated from fish gut: a review. Aquaculture Nutrition, 18(5), 465-492.	58
Proteobacteria	Gammaproteobacteria	Ferrimonas	Intestine/Feces	Rockfish (Sebastes pachycephalus)	Saltwater	Produces chitinase	Review	Ray, A. K., Ghosh, K., & Ringø, E. (2012). Enzyme‐producing bacteria isolated from fish gut: a review. Aquaculture Nutrition, 18(5), 465-492.	58
Proteobacteria	Gammaproteobacteria	Ferrimonas	Intestine/Feces	Mottled Spinefoot (Siganus fuscescens)	Saltwater	Produces chitinase	Review	Ray, A. K., Ghosh, K., & Ringø, E. (2012). Enzyme‐producing bacteria isolated from fish gut: a review. Aquaculture Nutrition, 18(5), 465-492.	58
Proteobacteria	Gammaproteobacteria	Ferrimonas	Intestine/Feces	Japanese Whiting (Sillago japonica)	Saltwater	Produces chitinase	Review	Ray, A. K., Ghosh, K., & Ringø, E. (2012). Enzyme‐producing bacteria isolated from fish gut: a review. Aquaculture Nutrition, 18(5), 465-492.	58
Proteobacteria	Gammaproteobacteria	Ferrimonas	Intestine/Feces	Grass Puffer (Takifugu niphobles)	Saltwater	Produces chitinase	Review	Ray, A. K., Ghosh, K., & Ringø, E. (2012). Enzyme‐producing bacteria isolated from fish gut: a review. Aquaculture Nutrition, 18(5), 465-492.	58
Proteobacteria	Gammaproteobacteria	Ferrimonas	Intestine/Feces	Cupid Wrasse (Thalassoma cupido)	Saltwater	Produces chitinase	Review	Ray, A. K., Ghosh, K., & Ringø, E. (2012). Enzyme‐producing bacteria isolated from fish gut: a review. Aquaculture Nutrition, 18(5), 465-492.	58
Bacteroidetes	Flavobacteriia	Flavobacterium	Intestine/Feces	Chum Salon (Oncorhynchus keta)	Saltwater	Produces protease	Review	Ray, A. K., Ghosh, K., & Ringø, E. (2012). Enzyme‐producing bacteria isolated from fish gut: a review. Aquaculture Nutrition, 18(5), 465-492.	58
Proteobacteria	Gammaproteobacteria	Grimontia	Intestine/Feces	Brown-Lined Puffer (Canthigaster rivulata)	Saltwater	Produces chitinase	Review	Ray, A. K., Ghosh, K., & Ringø, E. (2012). Enzyme‐producing bacteria isolated from fish gut: a review. Aquaculture Nutrition, 18(5), 465-492.	58
Proteobacteria	Gammaproteobacteria	Grimontia	Intestine/Feces	Sea Chub (Girella leonina)	Saltwater	Produces chitinase	Review	Ray, A. K., Ghosh, K., & Ringø, E. (2012). Enzyme‐producing bacteria isolated from fish gut: a review. Aquaculture Nutrition, 18(5), 465-492.	58
Proteobacteria	Gammaproteobacteria	Grimontia	Intestine/Feces	Smallscale Blackfish (Girella punctata)	Saltwater	Produces chitinase	Review	Ray, A. K., Ghosh, K., & Ringø, E. (2012). Enzyme‐producing bacteria isolated from fish gut: a review. Aquaculture Nutrition, 18(5), 465-492.	58
Proteobacteria	Gammaproteobacteria	Grimontia	Intestine/Feces	Morwong (Goniistius zonatus)	Saltwater	Produces chitinase	Review	Ray, A. K., Ghosh, K., & Ringø, E. (2012). Enzyme‐producing bacteria isolated from fish gut: a review. Aquaculture Nutrition, 18(5), 465-492.	58
Proteobacteria	Gammaproteobacteria	Grimontia	Intestine/Feces	Kidako Moray (Gymnothorax kidako)	Saltwater	Produces chitinase	Review	Ray, A. K., Ghosh, K., & Ringø, E. (2012). Enzyme‐producing bacteria isolated from fish gut: a review. Aquaculture Nutrition, 18(5), 465-492.	58
Proteobacteria	Gammaproteobacteria	Grimontia	Intestine/Feces	Stripey (Microcanthus strigatus)	Saltwater	Produces chitinase	Review	Ray, A. K., Ghosh, K., & Ringø, E. (2012). Enzyme‐producing bacteria isolated from fish gut: a review. Aquaculture Nutrition, 18(5), 465-492.	58
Proteobacteria	Gammaproteobacteria	Grimontia	Intestine/Feces	Rainbow Wrasse (Parajulis poecilepterus)	Saltwater	Produces chitinase	Review	Ray, A. K., Ghosh, K., & Ringø, E. (2012). Enzyme‐producing bacteria isolated from fish gut: a review. Aquaculture Nutrition, 18(5), 465-492.	58
Proteobacteria	Gammaproteobacteria	Grimontia	Intestine/Feces	White Trevally (Pseudocaranx dentex)	Saltwater	Produces chitinase	Review	Ray, A. K., Ghosh, K., & Ringø, E. (2012). Enzyme‐producing bacteria isolated from fish gut: a review. Aquaculture Nutrition, 18(5), 465-492.	58
Proteobacteria	Gammaproteobacteria	Grimontia	Intestine/Feces	Wrasse (Pseudolabrus sieboldi)	Saltwater	Produces chitinase	Review	Ray, A. K., Ghosh, K., & Ringø, E. (2012). Enzyme‐producing bacteria isolated from fish gut: a review. Aquaculture Nutrition, 18(5), 465-492.	58
Proteobacteria	Gammaproteobacteria	Grimontia	Intestine/Feces	Cocktail Wrasse (Pteragogus flagellifer)	Saltwater	Produces chitinase	Review	Ray, A. K., Ghosh, K., & Ringø, E. (2012). Enzyme‐producing bacteria isolated from fish gut: a review. Aquaculture Nutrition, 18(5), 465-492.	58
Proteobacteria	Gammaproteobacteria	Grimontia	Intestine/Feces	Rockfish (Sebastes pachycephalus)	Saltwater	Produces chitinase	Review	Ray, A. K., Ghosh, K., & Ringø, E. (2012). Enzyme‐producing bacteria isolated from fish gut: a review. Aquaculture Nutrition, 18(5), 465-492.	58
Proteobacteria	Gammaproteobacteria	Grimontia	Intestine/Feces	Mottled Spinefoot (Siganus fuscescens)	Saltwater	Produces chitinase	Review	Ray, A. K., Ghosh, K., & Ringø, E. (2012). Enzyme‐producing bacteria isolated from fish gut: a review. Aquaculture Nutrition, 18(5), 465-492.	58
Proteobacteria	Gammaproteobacteria	Grimontia	Intestine/Feces	Japanese Whiting (Sillago japonica)	Saltwater	Produces chitinase	Review	Ray, A. K., Ghosh, K., & Ringø, E. (2012). Enzyme‐producing bacteria isolated from fish gut: a review. Aquaculture Nutrition, 18(5), 465-492.	58
Proteobacteria	Gammaproteobacteria	Grimontia	Intestine/Feces	Grass Puffer (Takifugu niphobles)	Saltwater	Produces chitinase	Review	Ray, A. K., Ghosh, K., & Ringø, E. (2012). Enzyme‐producing bacteria isolated from fish gut: a review. Aquaculture Nutrition, 18(5), 465-492.	58
Proteobacteria	Gammaproteobacteria	Grimontia	Intestine/Feces	Cupid Wrasse (Thalassoma cupido)	Saltwater	Produces chitinase	Review	Ray, A. K., Ghosh, K., & Ringø, E. (2012). Enzyme‐producing bacteria isolated from fish gut: a review. Aquaculture Nutrition, 18(5), 465-492.	58
Proteobacteria	Gammaproteobacteria	Marinobacter	Intestine/Feces	Brown-Lined Puffer (Canthigaster rivulata)	Saltwater	Produces chitinase	Review	Ray, A. K., Ghosh, K., & Ringø, E. (2012). Enzyme‐producing bacteria isolated from fish gut: a review. Aquaculture Nutrition, 18(5), 465-492.	58
Proteobacteria	Gammaproteobacteria	Marinobacter	Intestine/Feces	Sea Chub (Girella leonina)	Saltwater	Produces chitinase	Review	Ray, A. K., Ghosh, K., & Ringø, E. (2012). Enzyme‐producing bacteria isolated from fish gut: a review. Aquaculture Nutrition, 18(5), 465-492.	58
Proteobacteria	Gammaproteobacteria	Marinobacter	Intestine/Feces	Smallscale Blackfish (Girella punctata)	Saltwater	Produces chitinase	Review	Ray, A. K., Ghosh, K., & Ringø, E. (2012). Enzyme‐producing bacteria isolated from fish gut: a review. Aquaculture Nutrition, 18(5), 465-492.	58
Proteobacteria	Gammaproteobacteria	Marinobacter	Intestine/Feces	Morwong (Goniistius zonatus)	Saltwater	Produces chitinase	Review	Ray, A. K., Ghosh, K., & Ringø, E. (2012). Enzyme‐producing bacteria isolated from fish gut: a review. Aquaculture Nutrition, 18(5), 465-492.	58
Proteobacteria	Gammaproteobacteria	Marinobacter	Intestine/Feces	Kidako Moray (Gymnothorax kidako)	Saltwater	Produces chitinase	Review	Ray, A. K., Ghosh, K., & Ringø, E. (2012). Enzyme‐producing bacteria isolated from fish gut: a review. Aquaculture Nutrition, 18(5), 465-492.	58
Proteobacteria	Gammaproteobacteria	Marinobacter	Intestine/Feces	Stripey (Microcanthus strigatus)	Saltwater	Produces chitinase	Review	Ray, A. K., Ghosh, K., & Ringø, E. (2012). Enzyme‐producing bacteria isolated from fish gut: a review. Aquaculture Nutrition, 18(5), 465-492.	58
Proteobacteria	Gammaproteobacteria	Marinobacter	Intestine/Feces	Rainbow Wrasse (Parajulis poecilepterus)	Saltwater	Produces chitinase	Review	Ray, A. K., Ghosh, K., & Ringø, E. (2012). Enzyme‐producing bacteria isolated from fish gut: a review. Aquaculture Nutrition, 18(5), 465-492.	58
Proteobacteria	Gammaproteobacteria	Marinobacter	Intestine/Feces	White Trevally (Pseudocaranx dentex)	Saltwater	Produces chitinase	Review	Ray, A. K., Ghosh, K., & Ringø, E. (2012). Enzyme‐producing bacteria isolated from fish gut: a review. Aquaculture Nutrition, 18(5), 465-492.	58
Proteobacteria	Gammaproteobacteria	Marinobacter	Intestine/Feces	Wrasse (Pseudolabrus sieboldi)	Saltwater	Produces chitinase	Review	Ray, A. K., Ghosh, K., & Ringø, E. (2012). Enzyme‐producing bacteria isolated from fish gut: a review. Aquaculture Nutrition, 18(5), 465-492.	58
Proteobacteria	Gammaproteobacteria	Marinobacter	Intestine/Feces	Cocktail Wrasse (Pteragogus flagellifer)	Saltwater	Produces chitinase	Review	Ray, A. K., Ghosh, K., & Ringø, E. (2012). Enzyme‐producing bacteria isolated from fish gut: a review. Aquaculture Nutrition, 18(5), 465-492.	58
Proteobacteria	Gammaproteobacteria	Marinobacter	Intestine/Feces	Rockfish (Sebastes pachycephalus)	Saltwater	Produces chitinase	Review	Ray, A. K., Ghosh, K., & Ringø, E. (2012). Enzyme‐producing bacteria isolated from fish gut: a review. Aquaculture Nutrition, 18(5), 465-492.	58
Proteobacteria	Gammaproteobacteria	Marinobacter	Intestine/Feces	Mottled Spinefoot (Siganus fuscescens)	Saltwater	Produces chitinase	Review	Ray, A. K., Ghosh, K., & Ringø, E. (2012). Enzyme‐producing bacteria isolated from fish gut: a review. Aquaculture Nutrition, 18(5), 465-492.	58
Proteobacteria	Gammaproteobacteria	Marinobacter	Intestine/Feces	Japanese Whiting (Sillago japonica)	Saltwater	Produces chitinase	Review	Ray, A. K., Ghosh, K., & Ringø, E. (2012). Enzyme‐producing bacteria isolated from fish gut: a review. Aquaculture Nutrition, 18(5), 465-492.	58
Proteobacteria	Gammaproteobacteria	Marinobacter	Intestine/Feces	Grass Puffer (Takifugu niphobles)	Saltwater	Produces chitinase	Review	Ray, A. K., Ghosh, K., & Ringø, E. (2012). Enzyme‐producing bacteria isolated from fish gut: a review. Aquaculture Nutrition, 18(5), 465-492.	58
Proteobacteria	Gammaproteobacteria	Marinobacter	Intestine/Feces	Cupid Wrasse (Thalassoma cupido)	Saltwater	Produces chitinase	Review	Ray, A. K., Ghosh, K., & Ringø, E. (2012). Enzyme‐producing bacteria isolated from fish gut: a review. Aquaculture Nutrition, 18(5), 465-492.	58
Proteobacteria	Gammaproteobacteria	Photobacterium	Intestine/Feces	Brown-Lined Puffer (Canthigaster rivulata)	Saltwater	Produces chitinase	Review	Ray, A. K., Ghosh, K., & Ringø, E. (2012). Enzyme‐producing bacteria isolated from fish gut: a review. Aquaculture Nutrition, 18(5), 465-492.	58
Proteobacteria	Gammaproteobacteria	Photobacterium	Intestine/Feces	Sea Chub (Girella leonina)	Saltwater	Produces chitinase	Review	Ray, A. K., Ghosh, K., & Ringø, E. (2012). Enzyme‐producing bacteria isolated from fish gut: a review. Aquaculture Nutrition, 18(5), 465-492.	58
Proteobacteria	Gammaproteobacteria	Photobacterium	Intestine/Feces	Smallscale Blackfish (Girella punctata)	Saltwater	Produces chitinase	Review	Ray, A. K., Ghosh, K., & Ringø, E. (2012). Enzyme‐producing bacteria isolated from fish gut: a review. Aquaculture Nutrition, 18(5), 465-492.	58
Proteobacteria	Gammaproteobacteria	Photobacterium	Intestine/Feces	Morwong (Goniistius zonatus)	Saltwater	Produces chitinase	Review	Ray, A. K., Ghosh, K., & Ringø, E. (2012). Enzyme‐producing bacteria isolated from fish gut: a review. Aquaculture Nutrition, 18(5), 465-492.	58
Proteobacteria	Gammaproteobacteria	Photobacterium	Intestine/Feces	Kidako Moray (Gymnothorax kidako)	Saltwater	Produces chitinase	Review	Ray, A. K., Ghosh, K., & Ringø, E. (2012). Enzyme‐producing bacteria isolated from fish gut: a review. Aquaculture Nutrition, 18(5), 465-492.	58
Proteobacteria	Gammaproteobacteria	Photobacterium	Intestine/Feces	Stripey (Microcanthus strigatus)	Saltwater	Produces chitinase	Review	Ray, A. K., Ghosh, K., & Ringø, E. (2012). Enzyme‐producing bacteria isolated from fish gut: a review. Aquaculture Nutrition, 18(5), 465-492.	58
Proteobacteria	Gammaproteobacteria	Photobacterium	Intestine/Feces	Rainbow Wrasse (Parajulis poecilepterus)	Saltwater	Produces chitinase	Review	Ray, A. K., Ghosh, K., & Ringø, E. (2012). Enzyme‐producing bacteria isolated from fish gut: a review. Aquaculture Nutrition, 18(5), 465-492.	58
Proteobacteria	Gammaproteobacteria	Photobacterium	Intestine/Feces	White Trevally (Pseudocaranx dentex)	Saltwater	Produces chitinase	Review	Ray, A. K., Ghosh, K., & Ringø, E. (2012). Enzyme‐producing bacteria isolated from fish gut: a review. Aquaculture Nutrition, 18(5), 465-492.	58
Proteobacteria	Gammaproteobacteria	Photobacterium	Intestine/Feces	Wrasse (Pseudolabrus sieboldi)	Saltwater	Produces chitinase	Review	Ray, A. K., Ghosh, K., & Ringø, E. (2012). Enzyme‐producing bacteria isolated from fish gut: a review. Aquaculture Nutrition, 18(5), 465-492.	58
Proteobacteria	Gammaproteobacteria	Photobacterium	Intestine/Feces	Cocktail Wrasse (Pteragogus flagellifer)	Saltwater	Produces chitinase	Review	Ray, A. K., Ghosh, K., & Ringø, E. (2012). Enzyme‐producing bacteria isolated from fish gut: a review. Aquaculture Nutrition, 18(5), 465-492.	58
Proteobacteria	Gammaproteobacteria	Photobacterium	Intestine/Feces	Rockfish (Sebastes pachycephalus)	Saltwater	Produces chitinase	Review	Ray, A. K., Ghosh, K., & Ringø, E. (2012). Enzyme‐producing bacteria isolated from fish gut: a review. Aquaculture Nutrition, 18(5), 465-492.	58
Proteobacteria	Gammaproteobacteria	Photobacterium	Intestine/Feces	Pinspotted Spinefoot (Siganus fuscescens)	Saltwater	Produces chitinase	Review	Ray, A. K., Ghosh, K., & Ringø, E. (2012). Enzyme‐producing bacteria isolated from fish gut: a review. Aquaculture Nutrition, 18(5), 465-492.	58
Proteobacteria	Gammaproteobacteria	Photobacterium	Intestine/Feces	Japanese Whiting (Sillago japonica)	Saltwater	Produces chitinase	Review	Ray, A. K., Ghosh, K., & Ringø, E. (2012). Enzyme‐producing bacteria isolated from fish gut: a review. Aquaculture Nutrition, 18(5), 465-492.	58
Proteobacteria	Gammaproteobacteria	Photobacterium	Intestine/Feces	Grass Puffer (Takifugu niphobles)	Saltwater	Produces chitinase	Review	Ray, A. K., Ghosh, K., & Ringø, E. (2012). Enzyme‐producing bacteria isolated from fish gut: a review. Aquaculture Nutrition, 18(5), 465-492.	58
Proteobacteria	Gammaproteobacteria	Photobacterium	Intestine/Feces	Cupid Wrasse (Thalassoma cupido)	Saltwater	Produces chitinase	Review	Ray, A. K., Ghosh, K., & Ringø, E. (2012). Enzyme‐producing bacteria isolated from fish gut: a review. Aquaculture Nutrition, 18(5), 465-492.	58
Proteobacteria	Gammaproteobacteria	Pseudoalteromonas	Intestine/Feces	Hake (Merluccius hubbsi)	Saltwater	Produces protease	Review	Ray, A. K., Ghosh, K., & Ringø, E. (2012). Enzyme‐producing bacteria isolated from fish gut: a review. Aquaculture Nutrition, 18(5), 465-492.	58
Proteobacteria	Gammaproteobacteria	Pseudoalteromonas	Intestine/Feces	Brown-Lined Puffer (Canthigaster rivulata)	Saltwater	Produces chitinase	Review	Ray, A. K., Ghosh, K., & Ringø, E. (2012). Enzyme‐producing bacteria isolated from fish gut: a review. Aquaculture Nutrition, 18(5), 465-492.	58
Proteobacteria	Gammaproteobacteria	Pseudoalteromonas	Intestine/Feces	Sea Chub (Girella leonina)	Saltwater	Produces chitinase	Review	Ray, A. K., Ghosh, K., & Ringø, E. (2012). Enzyme‐producing bacteria isolated from fish gut: a review. Aquaculture Nutrition, 18(5), 465-492.	58
Proteobacteria	Gammaproteobacteria	Pseudoalteromonas	Intestine/Feces	Smallscale Blackfish (Girella punctata)	Saltwater	Produces chitinase	Review	Ray, A. K., Ghosh, K., & Ringø, E. (2012). Enzyme‐producing bacteria isolated from fish gut: a review. Aquaculture Nutrition, 18(5), 465-492.	58
Proteobacteria	Gammaproteobacteria	Pseudoalteromonas	Intestine/Feces	Morwong (Goniistius zonatus)	Saltwater	Produces chitinase	Review	Ray, A. K., Ghosh, K., & Ringø, E. (2012). Enzyme‐producing bacteria isolated from fish gut: a review. Aquaculture Nutrition, 18(5), 465-492.	58
Proteobacteria	Gammaproteobacteria	Pseudoalteromonas	Intestine/Feces	Kidako Moray (Gymnothorax kidako)	Saltwater	Produces chitinase	Review	Ray, A. K., Ghosh, K., & Ringø, E. (2012). Enzyme‐producing bacteria isolated from fish gut: a review. Aquaculture Nutrition, 18(5), 465-492.	58
Proteobacteria	Gammaproteobacteria	Pseudoalteromonas	Intestine/Feces	Stripey (Microcanthus strigatus)	Saltwater	Produces chitinase	Review	Ray, A. K., Ghosh, K., & Ringø, E. (2012). Enzyme‐producing bacteria isolated from fish gut: a review. Aquaculture Nutrition, 18(5), 465-492.	58
Proteobacteria	Gammaproteobacteria	Pseudoalteromonas	Intestine/Feces	Rainbow Wrasse (Parajulis poecilepterus)	Saltwater	Produces chitinase	Review	Ray, A. K., Ghosh, K., & Ringø, E. (2012). Enzyme‐producing bacteria isolated from fish gut: a review. Aquaculture Nutrition, 18(5), 465-492.	58
Proteobacteria	Gammaproteobacteria	Pseudoalteromonas	Intestine/Feces	White Trevally (Pseudocaranx dentex)	Saltwater	Produces chitinase	Review	Ray, A. K., Ghosh, K., & Ringø, E. (2012). Enzyme‐producing bacteria isolated from fish gut: a review. Aquaculture Nutrition, 18(5), 465-492.	58
Proteobacteria	Gammaproteobacteria	Pseudoalteromonas	Intestine/Feces	Wrasse (Pseudolabrus sieboldi)	Saltwater	Produces chitinase	Review	Ray, A. K., Ghosh, K., & Ringø, E. (2012). Enzyme‐producing bacteria isolated from fish gut: a review. Aquaculture Nutrition, 18(5), 465-492.	58
Proteobacteria	Gammaproteobacteria	Pseudoalteromonas	Intestine/Feces	Cocktail Wrasse (Pteragogus flagellifer)	Saltwater	Produces chitinase	Review	Ray, A. K., Ghosh, K., & Ringø, E. (2012). Enzyme‐producing bacteria isolated from fish gut: a review. Aquaculture Nutrition, 18(5), 465-492.	58
Proteobacteria	Gammaproteobacteria	Pseudoalteromonas	Intestine/Feces	Rockfish (Sebastes pachycephalus)	Saltwater	Produces chitinase	Review	Ray, A. K., Ghosh, K., & Ringø, E. (2012). Enzyme‐producing bacteria isolated from fish gut: a review. Aquaculture Nutrition, 18(5), 465-492.	58
Proteobacteria	Gammaproteobacteria	Pseudoalteromonas	Intestine/Feces	Mottled Spinefoot (Siganus fuscescens)	Saltwater	Produces chitinase	Review	Ray, A. K., Ghosh, K., & Ringø, E. (2012). Enzyme‐producing bacteria isolated from fish gut: a review. Aquaculture Nutrition, 18(5), 465-492.	58
Proteobacteria	Gammaproteobacteria	Pseudoalteromonas	Intestine/Feces	Japanese Whiting (Sillago japonica)	Saltwater	Produces chitinase	Review	Ray, A. K., Ghosh, K., & Ringø, E. (2012). Enzyme‐producing bacteria isolated from fish gut: a review. Aquaculture Nutrition, 18(5), 465-492.	58
Proteobacteria	Gammaproteobacteria	Pseudoalteromonas	Intestine/Feces	Grass Puffer (Takifugu niphobles)	Saltwater	Produces chitinase	Review	Ray, A. K., Ghosh, K., & Ringø, E. (2012). Enzyme‐producing bacteria isolated from fish gut: a review. Aquaculture Nutrition, 18(5), 465-492.	58
Proteobacteria	Gammaproteobacteria	Pseudoalteromonas	Intestine/Feces	Cupid Wrasse (Thalassoma cupido)	Saltwater	Produces chitinase	Review	Ray, A. K., Ghosh, K., & Ringø, E. (2012). Enzyme‐producing bacteria isolated from fish gut: a review. Aquaculture Nutrition, 18(5), 465-492.	58
Proteobacteria	Gammaproteobacteria	Pseudomonas	Intestine/Feces	Sea Bass (Dicentrarchus labrax)	Saltwater	Produces lipase	Review	Ray, A. K., Ghosh, K., & Ringø, E. (2012). Enzyme‐producing bacteria isolated from fish gut: a review. Aquaculture Nutrition, 18(5), 465-492.	58
Proteobacteria	Gammaproteobacteria	Pseudomonas	Intestine/Feces	Flathead Grey Mullet (Mugil cephalus)	Saltwater	Produces protease, chitinase	Review	Ray, A. K., Ghosh, K., & Ringø, E. (2012). Enzyme‐producing bacteria isolated from fish gut: a review. Aquaculture Nutrition, 18(5), 465-492.	58
Proteobacteria	Gammaproteobacteria	Pseudomonas	Intestine/Feces	Arabesque greenling (Pleurogrammus azonus)	Saltwater	Produces protease	Review	Ray, A. K., Ghosh, K., & Ringø, E. (2012). Enzyme‐producing bacteria isolated from fish gut: a review. Aquaculture Nutrition, 18(5), 465-492.	58
Proteobacteria	Gammaproteobacteria	Vibrio	Intestine/Feces	Sea Bass (Dicentrarchus labrax)	Saltwater	Produces amylase, protease	Review	Ray, A. K., Ghosh, K., & Ringø, E. (2012). Enzyme‐producing bacteria isolated from fish gut: a review. Aquaculture Nutrition, 18(5), 465-492.	58
Proteobacteria	Gammaproteobacteria	Vibrio	Intestine/Feces	Flathead Grey Mullet (Mugil cephalus)	Saltwater	Produces protease, chitinase	Review	Ray, A. K., Ghosh, K., & Ringø, E. (2012). Enzyme‐producing bacteria isolated from fish gut: a review. Aquaculture Nutrition, 18(5), 465-492.	58
Proteobacteria	Gammaproteobacteria	Vibrio	Intestine/Feces	Brown-Lined Puffer (Canthigaster rivulata)	Saltwater	Produces chitinase	Review	Ray, A. K., Ghosh, K., & Ringø, E. (2012). Enzyme‐producing bacteria isolated from fish gut: a review. Aquaculture Nutrition, 18(5), 465-492.	58
Proteobacteria	Gammaproteobacteria	Vibrio	Intestine/Feces	Sea Chub (Girella leonina)	Saltwater	Produces chitinase	Review	Ray, A. K., Ghosh, K., & Ringø, E. (2012). Enzyme‐producing bacteria isolated from fish gut: a review. Aquaculture Nutrition, 18(5), 465-492.	58
Proteobacteria	Gammaproteobacteria	Vibrio	Intestine/Feces	Smallscale Blackfish (Girella punctata)	Saltwater	Produces chitinase	Review	Ray, A. K., Ghosh, K., & Ringø, E. (2012). Enzyme‐producing bacteria isolated from fish gut: a review. Aquaculture Nutrition, 18(5), 465-492.	58
Proteobacteria	Gammaproteobacteria	Vibrio	Intestine/Feces	Morwong (Goniistius zonatus)	Saltwater	Produces chitinase	Review	Ray, A. K., Ghosh, K., & Ringø, E. (2012). Enzyme‐producing bacteria isolated from fish gut: a review. Aquaculture Nutrition, 18(5), 465-492.	58
Proteobacteria	Gammaproteobacteria	Vibrio	Intestine/Feces	Kidako Moray (Gymnothorax kidako)	Saltwater	Produces chitinase	Review	Ray, A. K., Ghosh, K., & Ringø, E. (2012). Enzyme‐producing bacteria isolated from fish gut: a review. Aquaculture Nutrition, 18(5), 465-492.	58
Proteobacteria	Gammaproteobacteria	Vibrio	Intestine/Feces	Stripey (Microcanthus strigatus)	Saltwater	Produces chitinase	Review	Ray, A. K., Ghosh, K., & Ringø, E. (2012). Enzyme‐producing bacteria isolated from fish gut: a review. Aquaculture Nutrition, 18(5), 465-492.	58
Proteobacteria	Gammaproteobacteria	Vibrio	Intestine/Feces	Rainbow Wrasse (Parajulis poecilepterus)	Saltwater	Produces chitinase	Review	Ray, A. K., Ghosh, K., & Ringø, E. (2012). Enzyme‐producing bacteria isolated from fish gut: a review. Aquaculture Nutrition, 18(5), 465-492.	58
Proteobacteria	Gammaproteobacteria	Vibrio	Intestine/Feces	White Trevally (Pseudocaranx dentex)	Saltwater	Produces chitinase	Review	Ray, A. K., Ghosh, K., & Ringø, E. (2012). Enzyme‐producing bacteria isolated from fish gut: a review. Aquaculture Nutrition, 18(5), 465-492.	58
Proteobacteria	Gammaproteobacteria	Vibrio	Intestine/Feces	Wrasse (Pseudolabrus sieboldi)	Saltwater	Produces chitinase	Review	Ray, A. K., Ghosh, K., & Ringø, E. (2012). Enzyme‐producing bacteria isolated from fish gut: a review. Aquaculture Nutrition, 18(5), 465-492.	58
Proteobacteria	Gammaproteobacteria	Vibrio	Intestine/Feces	Cocktail Wrasse (Pteragogus flagellifer)	Saltwater	Produces chitinase	Review	Ray, A. K., Ghosh, K., & Ringø, E. (2012). Enzyme‐producing bacteria isolated from fish gut: a review. Aquaculture Nutrition, 18(5), 465-492.	58
Proteobacteria	Gammaproteobacteria	Vibrio	Intestine/Feces	Rockfish (Sebastes pachycephalus)	Saltwater	Produces chitinase	Review	Ray, A. K., Ghosh, K., & Ringø, E. (2012). Enzyme‐producing bacteria isolated from fish gut: a review. Aquaculture Nutrition, 18(5), 465-492.	58
Proteobacteria	Gammaproteobacteria	Vibrio	Intestine/Feces	Mottled Spinefoot (Siganus fuscescens)	Saltwater	Produces chitinase	Review	Ray, A. K., Ghosh, K., & Ringø, E. (2012). Enzyme‐producing bacteria isolated from fish gut: a review. Aquaculture Nutrition, 18(5), 465-492.	58
Proteobacteria	Gammaproteobacteria	Vibrio	Intestine/Feces	Japanese Whiting (Sillago japonica)	Saltwater	Produces chitinase	Review	Ray, A. K., Ghosh, K., & Ringø, E. (2012). Enzyme‐producing bacteria isolated from fish gut: a review. Aquaculture Nutrition, 18(5), 465-492.	58
Proteobacteria	Gammaproteobacteria	Vibrio	Intestine/Feces	Grass Puffer (Takifugu niphobles)	Saltwater	Produces chitinase	Review	Ray, A. K., Ghosh, K., & Ringø, E. (2012). Enzyme‐producing bacteria isolated from fish gut: a review. Aquaculture Nutrition, 18(5), 465-492.	58
Proteobacteria	Gammaproteobacteria	Vibrio	Intestine/Feces	Cupid Wrasse (Thalassoma cupido)	Saltwater	Produces chitinase	Review	Ray, A. K., Ghosh, K., & Ringø, E. (2012). Enzyme‐producing bacteria isolated from fish gut: a review. Aquaculture Nutrition, 18(5), 465-492.	58
Proteobacteria	Gammaproteobacteria	Vibrio	Intestine/Feces	Japanese Flounder (Paralichthys olivaceus)	Saltwater	Produces chitinase	Review	Ray, A. K., Ghosh, K., & Ringø, E. (2012). Enzyme‐producing bacteria isolated from fish gut: a review. Aquaculture Nutrition, 18(5), 465-492.	58
Firmicutes	Clostridia	Epulopiscium	Intestine/Feces	Surgeonfish (Acanthurus nigrofuscus)	Saltwater	Elevated in macroalgae-feeding surgeonfishes	16S sequencing and dietary classification of fish	Miyake, S., Ngugi, D. K., & Stingl, U. (2015). Diet strongly influences the gut microbiota of surgeonfishes. Molecular ecology, 24(3), 656-672.	64
Firmicutes	Clostridia	Epulopiscium	Intestine/Feces	Surgeonfish (Naso unicornis)	Saltwater	Elevated in macroalgae-feeding surgeonfishes	16S sequencing and dietary classification of fish	Miyake, S., Ngugi, D. K., & Stingl, U. (2015). Diet strongly influences the gut microbiota of surgeonfishes. Molecular ecology, 24(3), 656-672.	64
Firmicutes	Clostridia	Epulopiscium	Intestine/Feces	Surgeonfish (Naso elegans)	Saltwater	Elevated in macroalgae-feeding surgeonfishes	16S sequencing and dietary classification of fish	Miyake, S., Ngugi, D. K., & Stingl, U. (2015). Diet strongly influences the gut microbiota of surgeonfishes. Molecular ecology, 24(3), 656-672.	64
Firmicutes	Clostridia	Epulopiscium	Intestine/Feces	Surgeonfish (Zebrasoma xanthurum)	Saltwater	Elevated in macroalgae-feeding surgeonfishes	16S sequencing and dietary classification of fish	Miyake, S., Ngugi, D. K., & Stingl, U. (2015). Diet strongly influences the gut microbiota of surgeonfishes. Molecular ecology, 24(3), 656-672.	64
Firmicutes	Clostridia	Epulopiscium	Intestine/Feces	Surgeonfish (Zebrasoma desjardinii)	Saltwater	Elevated in macroalgae-feeding surgeonfishes	16S sequencing and dietary classification of fish	Miyake, S., Ngugi, D. K., & Stingl, U. (2015). Diet strongly influences the gut microbiota of surgeonfishes. Molecular ecology, 24(3), 656-672.	64
Firmicutes	Clostridia	Epulopiscium	Intestine/Feces	Surgeonfish (Acanthurus sohal)	Saltwater	Elevated in macroalgae-feeding surgeonfishes	16S sequencing and dietary classification of fish	Miyake, S., Ngugi, D. K., & Stingl, U. (2015). Diet strongly influences the gut microbiota of surgeonfishes. Molecular ecology, 24(3), 656-672.	64
Proteobacteria	Gammaproteobacteria	Vibrio	Intestine/Feces	Turbot (Scophthalmus maximus)	Saltwater/Estuarine	Quorum sensing and biofilm formation	16S sequencing and MG-RAST Functional Annotation	Xing, M., Hou, Z., Yuan, J., Liu, Y., Qu, Y., & Liu, B. (2013). Taxonomic and functional metagenomic profiling of gastrointestinal tract microbiome of the farmed adult turbot (Scophthalmus maximus). FEMS microbiology ecology, 86(3), 432-443.	68
Proteobacteria	Gammaproteobacteria	Vibrio	Intestine/Feces	Atlantic Salmon (Salmo salar)	Saltwater/Estuarine	Enriched in warm water	Targeted PCR of fish sampled at different water temperatures	Neuman, C., Hatje, E., Zarkasi, K. Z., Smullen, R., Bowman, J. P., & Katouli, M. (2016). The effect of diet and environmental temperature on the faecal microbiota of farmed T asmanian A tlantic S almon (S almo salar L.). Aquaculture Research, 47(2), 660-672.	75
Proteobacteria	Gammaproteobacteria	Vibrio	Skin	European Eel (Anguilla anguilla)	Estuarine	Core eel microbiome | cell wall/capsule, membrane transport, disease defense, cell-signaling, iron acquisition/metabolism, N/S/K metabolism, motility	16S sequencing and MG-RAST SEED Annotation	Carda-Diéguez, M., Ghai, R., Rodríguez-Valera, F., & Amaro, C. (2017). Wild eel microbiome reveals that skin mucus of fish could be a natural niche for aquatic mucosal pathogen evolution. Microbiome, 5(1), 1-15.	46
Actinobacteria	Actinobacteria	Arthrobacter	Skin	Rainbow Trout (Oncorhynchus mykiss)	Freshwater	Inhibit growth of aquatic fungal pathogens	Fungal growth assays followed by MALDI-TOF and 16S Sequencing	Lowrey, L., Woodhams, D. C., Tacchi, L., & Salinas, I. (2015). Topographical mapping of the rainbow trout (Oncorhynchus mykiss) microbiome reveals a diverse bacterial community with antifungal properties in the skin. Applied and Environmental Microbiology, 81(19), 6915-6925.	28
Proteobacteria	Gammaproteobacteria	Psychrobacter	Skin	Rainbow Trout (Oncorhynchus mykiss)	Freshwater	Inhibit growth of aquatic fungal pathogens	Fungal growth assays followed by MALDI-TOF and 16S Sequencing	Lowrey, L., Woodhams, D. C., Tacchi, L., & Salinas, I. (2015). Topographical mapping of the rainbow trout (Oncorhynchus mykiss) microbiome reveals a diverse bacterial community with antifungal properties in the skin. Applied and Environmental Microbiology, 81(19), 6915-6925.	28
Proteobacteria	Alphaproteobacteria	Reyranella	Skin	Flag Cichlid (Mesonauta festivus)	Freshwater	Hydrochemical adaptation	16S sequencing of fish across hydrochemical gradients	Sylvain, F. É., Holland, A., Audet‐Gilbert, É., Luis Val, A., & Derome, N. (2019). Amazon fish bacterial communities show structural convergence along widespread hydrochemical gradients. Molecular ecology, 28(15), 3612-3626.	43
Proteobacteria	Alphaproteobacteria	Reyranella	Skin	Black Piranha (Serrasalmus rhombeus)	Freshwater	Hydrochemical adaptation	16S sequencing of fish across hydrochemical gradients	Sylvain, F. É., Holland, A., Audet‐Gilbert, É., Luis Val, A., & Derome, N. (2019). Amazon fish bacterial communities show structural convergence along widespread hydrochemical gradients. Molecular ecology, 28(15), 3612-3626.	43
Proteobacteria	Alphaproteobacteria	Roseiarcus	Skin	Flag Cichlid (Mesonauta festivus)	Freshwater	Hydrochemical adaptation	16S sequencing of fish across hydrochemical gradients	Sylvain, F. É., Holland, A., Audet‐Gilbert, É., Luis Val, A., & Derome, N. (2019). Amazon fish bacterial communities show structural convergence along widespread hydrochemical gradients. Molecular ecology, 28(15), 3612-3626.	43
Proteobacteria	Alphaproteobacteria	Roseiarcus	Skin	Black Piranha (Serrasalmus rhombeus)	Freshwater	Hydrochemical adaptation	16S sequencing of fish across hydrochemical gradients	Sylvain, F. É., Holland, A., Audet‐Gilbert, É., Luis Val, A., & Derome, N. (2019). Amazon fish bacterial communities show structural convergence along widespread hydrochemical gradients. Molecular ecology, 28(15), 3612-3626.	43
Proteobacteria	Betaproteobacteria	Achromobacter	Skin	European Eel (Anguilla anguilla)	Freshwater	Core eel microbiome | cell wall/capsule, membrane transport, disease defense, cell-signaling, iron acquisition/metabolism, N/S/K metabolism, motility	16S sequencing and MG-RAST SEED Annotation	Carda-Diéguez, M., Ghai, R., Rodríguez-Valera, F., & Amaro, C. (2017). Wild eel microbiome reveals that skin mucus of fish could be a natural niche for aquatic mucosal pathogen evolution. Microbiome, 5(1), 1-15.	46
Proteobacteria	Gammaproteobacteria	Pseudomonas	Skin	European Eel (Anguilla anguilla)	Freshwater	Core eel microbiome | cell wall/capsule, membrane transport, disease defense, cell-signaling, iron acquisition/metabolism, N/S/K metabolism, motility	16S sequencing and MG-RAST SEED Annotation	Carda-Diéguez, M., Ghai, R., Rodríguez-Valera, F., & Amaro, C. (2017). Wild eel microbiome reveals that skin mucus of fish could be a natural niche for aquatic mucosal pathogen evolution. Microbiome, 5(1), 1-15.	46
Proteobacteria	Gammaproteobacteria	Stenotrophomonas	Skin	European Eel (Anguilla anguilla)	Freshwater	Core eel microbiome | cell wall/capsule, membrane transport, disease defense, cell-signaling, iron acquisition/metabolism, N/S/K metabolism, motility	16S sequencing and MG-RAST SEED Annotation	Carda-Diéguez, M., Ghai, R., Rodríguez-Valera, F., & Amaro, C. (2017). Wild eel microbiome reveals that skin mucus of fish could be a natural niche for aquatic mucosal pathogen evolution. Microbiome, 5(1), 1-15.	46
Proteobacteria	Betaproteobacteria	Azospira	Skin	Yellowtail Kingfish (Seriola lalandi)	Saltwater	Elevated in healthy fish	16S sequencing	Legrand, T. P., Catalano, S. R., Wos-Oxley, M. L., Stephens, F., Landos, M., Bansemer, M. S., ... & Oxley, A. (2018). The inner workings of the outer surface: skin and gill microbiota as indicators of changing gut health in yellowtail kingfish. Frontiers in microbiology, 8, 2664.	25
Actinobacteria	Actinobacteria	Corynebacterium	Skin	Yellowtail Kingfish (Seriola lalandi)	Saltwater	Elevated in healthy fish	16S sequencing	Legrand, T. P., Catalano, S. R., Wos-Oxley, M. L., Stephens, F., Landos, M., Bansemer, M. S., ... & Oxley, A. (2018). The inner workings of the outer surface: skin and gill microbiota as indicators of changing gut health in yellowtail kingfish. Frontiers in microbiology, 8, 2664.	25
Bacteroidetes	Flavobacteriia	Lutibacter	Skin	Yellowtail Kingfish (Seriola lalandi)	Saltwater	Elevated in diseased (enteritis) fish	16S sequencing	Legrand, T. P., Catalano, S. R., Wos-Oxley, M. L., Stephens, F., Landos, M., Bansemer, M. S., ... & Oxley, A. (2018). The inner workings of the outer surface: skin and gill microbiota as indicators of changing gut health in yellowtail kingfish. Frontiers in microbiology, 8, 2664.	25
Bacteroidetes	Flavobacteriia	Polaribacter	Skin	Yellowtail Kingfish (Seriola lalandi)	Saltwater	Elevated in diseased (enteritis) fish	16S sequencing	Legrand, T. P., Catalano, S. R., Wos-Oxley, M. L., Stephens, F., Landos, M., Bansemer, M. S., ... & Oxley, A. (2018). The inner workings of the outer surface: skin and gill microbiota as indicators of changing gut health in yellowtail kingfish. Frontiers in microbiology, 8, 2664.	25
Cyanobacteria	Cyanophyceae	Synechococcus	Skin	Yellowtail Kingfish (Seriola lalandi)	Saltwater	Elevated in healthy fish	16S sequencing	Legrand, T. P., Catalano, S. R., Wos-Oxley, M. L., Stephens, F., Landos, M., Bansemer, M. S., ... & Oxley, A. (2018). The inner workings of the outer surface: skin and gill microbiota as indicators of changing gut health in yellowtail kingfish. Frontiers in microbiology, 8, 2664.	25
Actinobacteria	Actinobacteria	Dietzia	Skin	Brook Charr (Salvelinus fontinalis)	Freshwater	Inhibit growth of common fish pathogens	Pathogen competition assays followed by 16S sequencing	Boutin, S., Bernatchez, L., Audet, C., & Derôme, N. (2012). Antagonistic effect of indigenous skin bacteria of brook charr (Salvelinus fontinalis) against Flavobacterium columnare and F. psychrophilum. Veterinary microbiology, 155(2-4), 355-361.	37
Actinobacteria	Actinobacteria	Leucobacter	Skin	Brook Charr (Salvelinus fontinalis)	Freshwater	Inhibit growth of common fish pathogens	Pathogen competition assays followed by 16S sequencing	Boutin, S., Bernatchez, L., Audet, C., & Derôme, N. (2012). Antagonistic effect of indigenous skin bacteria of brook charr (Salvelinus fontinalis) against Flavobacterium columnare and F. psychrophilum. Veterinary microbiology, 155(2-4), 355-361.	37
Proteobacteria	Gammaproteobacteria	Luteimonas	Skin	Brook Charr (Salvelinus fontinalis)	Freshwater	Inhibit growth of common fish pathogens	Pathogen competition assays followed by 16S sequencing	Boutin, S., Bernatchez, L., Audet, C., & Derôme, N. (2012). Antagonistic effect of indigenous skin bacteria of brook charr (Salvelinus fontinalis) against Flavobacterium columnare and F. psychrophilum. Veterinary microbiology, 155(2-4), 355-361.	37
Actinobacteria	Actinobacteria	Microbacterium	Skin	Brook Charr (Salvelinus fontinalis)	Freshwater	Inhibit growth of common fish pathogens	Pathogen competition assays followed by 16S sequencing	Boutin, S., Bernatchez, L., Audet, C., & Derôme, N. (2012). Antagonistic effect of indigenous skin bacteria of brook charr (Salvelinus fontinalis) against Flavobacterium columnare and F. psychrophilum. Veterinary microbiology, 155(2-4), 355-361.	37
Actinobacteria	Actinobacteria	Rhodococcus	Skin	Brook Charr (Salvelinus fontinalis)	Freshwater	Inhibit growth of common fish pathogens	Pathogen competition assays followed by 16S sequencing	Boutin, S., Bernatchez, L., Audet, C., & Derôme, N. (2012). Antagonistic effect of indigenous skin bacteria of brook charr (Salvelinus fontinalis) against Flavobacterium columnare and F. psychrophilum. Veterinary microbiology, 155(2-4), 355-361.	37
Proteobacteria	Alphaproteobacteria	Sphingopyxis	Skin	Brook Charr (Salvelinus fontinalis)	Freshwater	Inhibit growth of common fish pathogens	Pathogen competition assays followed by 16S sequencing	Boutin, S., Bernatchez, L., Audet, C., & Derôme, N. (2012). Antagonistic effect of indigenous skin bacteria of brook charr (Salvelinus fontinalis) against Flavobacterium columnare and F. psychrophilum. Veterinary microbiology, 155(2-4), 355-361.	37
Proteobacteria	Gammaproteobacteria	Alteromonas	Skin, Gills	Yellowtail Kingfish (Seriola lalandi)	Saltwater	Elevated in healthy fish	16S sequencing	Legrand, T. P., Catalano, S. R., Wos-Oxley, M. L., Stephens, F., Landos, M., Bansemer, M. S., ... & Oxley, A. (2018). The inner workings of the outer surface: skin and gill microbiota as indicators of changing gut health in yellowtail kingfish. Frontiers in microbiology, 8, 2664.	25
Proteobacteria	Alphaproteobacteria	Ascidiaceihabitans	Skin, Gills	Yellowtail Kingfish (Seriola lalandi)	Saltwater	Elevated in healthy fish	16S sequencing	Legrand, T. P., Catalano, S. R., Wos-Oxley, M. L., Stephens, F., Landos, M., Bansemer, M. S., ... & Oxley, A. (2018). The inner workings of the outer surface: skin and gill microbiota as indicators of changing gut health in yellowtail kingfish. Frontiers in microbiology, 8, 2664.	25
Actinobacteria	Actinobacteria	Candidatus Aquiluna	Skin, Gills	Yellowtail Kingfish (Seriola lalandi)	Saltwater	Elevated in diseased (enteritis) fish	16S sequencing	Legrand, T. P., Catalano, S. R., Wos-Oxley, M. L., Stephens, F., Landos, M., Bansemer, M. S., ... & Oxley, A. (2018). The inner workings of the outer surface: skin and gill microbiota as indicators of changing gut health in yellowtail kingfish. Frontiers in microbiology, 8, 2664.	25
Proteobacteria	Betaproteobacteria	Candidatus Glomeribacter	Skin, Gills	Yellowtail Kingfish (Seriola lalandi)	Saltwater	Elevated in healthy fish	16S sequencing	Legrand, T. P., Catalano, S. R., Wos-Oxley, M. L., Stephens, F., Landos, M., Bansemer, M. S., ... & Oxley, A. (2018). The inner workings of the outer surface: skin and gill microbiota as indicators of changing gut health in yellowtail kingfish. Frontiers in microbiology, 8, 2664.	25
Proteobacteria	Betaproteobacteria	Ferrovum	Skin, Gills	Yellowtail Kingfish (Seriola lalandi)	Saltwater	Elevated in healthy fish	16S sequencing	Legrand, T. P., Catalano, S. R., Wos-Oxley, M. L., Stephens, F., Landos, M., Bansemer, M. S., ... & Oxley, A. (2018). The inner workings of the outer surface: skin and gill microbiota as indicators of changing gut health in yellowtail kingfish. Frontiers in microbiology, 8, 2664.	25
Proteobacteria	Gammaproteobacteria	Glaciecola	Skin, Gills	Yellowtail Kingfish (Seriola lalandi)	Saltwater	Elevated in healthy fish	16S sequencing	Legrand, T. P., Catalano, S. R., Wos-Oxley, M. L., Stephens, F., Landos, M., Bansemer, M. S., ... & Oxley, A. (2018). The inner workings of the outer surface: skin and gill microbiota as indicators of changing gut health in yellowtail kingfish. Frontiers in microbiology, 8, 2664.	25
Proteobacteria	Gammaproteobacteria	Halomonas	Skin, Gills	Yellowtail Kingfish (Seriola lalandi)	Saltwater	Elevated in healthy fish	16S sequencing	Legrand, T. P., Catalano, S. R., Wos-Oxley, M. L., Stephens, F., Landos, M., Bansemer, M. S., ... & Oxley, A. (2018). The inner workings of the outer surface: skin and gill microbiota as indicators of changing gut health in yellowtail kingfish. Frontiers in microbiology, 8, 2664.	25
Proteobacteria	Gammaproteobacteria	Idiomarina	Skin, Gills	Yellowtail Kingfish (Seriola lalandi)	Saltwater	Elevated in healthy fish	16S sequencing	Legrand, T. P., Catalano, S. R., Wos-Oxley, M. L., Stephens, F., Landos, M., Bansemer, M. S., ... & Oxley, A. (2018). The inner workings of the outer surface: skin and gill microbiota as indicators of changing gut health in yellowtail kingfish. Frontiers in microbiology, 8, 2664.	25
Proteobacteria	Gammaproteobacteria	Litoricola	Skin, Gills	Yellowtail Kingfish (Seriola lalandi)	Saltwater	Elevated in diseased (enteritis) fish	16S sequencing	Legrand, T. P., Catalano, S. R., Wos-Oxley, M. L., Stephens, F., Landos, M., Bansemer, M. S., ... & Oxley, A. (2018). The inner workings of the outer surface: skin and gill microbiota as indicators of changing gut health in yellowtail kingfish. Frontiers in microbiology, 8, 2664.	25
Proteobacteria	Alphaproteobacteria	Loktanella	Skin, Gills	Yellowtail Kingfish (Seriola lalandi)	Saltwater	Elevated in diseased (enteritis) fish	16S sequencing	Legrand, T. P., Catalano, S. R., Wos-Oxley, M. L., Stephens, F., Landos, M., Bansemer, M. S., ... & Oxley, A. (2018). The inner workings of the outer surface: skin and gill microbiota as indicators of changing gut health in yellowtail kingfish. Frontiers in microbiology, 8, 2664.	25
Proteobacteria	Gammaproteobacteria	Marinobacter	Skin, Gills	Yellowtail Kingfish (Seriola lalandi)	Saltwater	Elevated in healthy fish	16S sequencing	Legrand, T. P., Catalano, S. R., Wos-Oxley, M. L., Stephens, F., Landos, M., Bansemer, M. S., ... & Oxley, A. (2018). The inner workings of the outer surface: skin and gill microbiota as indicators of changing gut health in yellowtail kingfish. Frontiers in microbiology, 8, 2664.	25
Proteobacteria	Alphaproteobacteria	Marivita	Skin, Gills	Yellowtail Kingfish (Seriola lalandi)	Saltwater	Elevated in diseased (enteritis) fish	16S sequencing	Legrand, T. P., Catalano, S. R., Wos-Oxley, M. L., Stephens, F., Landos, M., Bansemer, M. S., ... & Oxley, A. (2018). The inner workings of the outer surface: skin and gill microbiota as indicators of changing gut health in yellowtail kingfish. Frontiers in microbiology, 8, 2664.	25
Proteobacteria	Gammaproteobacteria	Photobacterium	Skin, Gills	Yellowtail Kingfish (Seriola lalandi)	Saltwater	Elevated in healthy fish	16S sequencing	Legrand, T. P., Catalano, S. R., Wos-Oxley, M. L., Stephens, F., Landos, M., Bansemer, M. S., ... & Oxley, A. (2018). The inner workings of the outer surface: skin and gill microbiota as indicators of changing gut health in yellowtail kingfish. Frontiers in microbiology, 8, 2664.	25
Proteobacteria	Alphaproteobacteria	Planktomarina	Skin, Gills	Yellowtail Kingfish (Seriola lalandi)	Saltwater	Elevated in diseased (enteritis) fish	16S sequencing	Legrand, T. P., Catalano, S. R., Wos-Oxley, M. L., Stephens, F., Landos, M., Bansemer, M. S., ... & Oxley, A. (2018). The inner workings of the outer surface: skin and gill microbiota as indicators of changing gut health in yellowtail kingfish. Frontiers in microbiology, 8, 2664.	25
Proteobacteria	Gammaproteobacteria	Pseudoalteromonas	Skin, Gills	Yellowtail Kingfish (Seriola lalandi)	Saltwater	Elevated in healthy fish	16S sequencing	Legrand, T. P., Catalano, S. R., Wos-Oxley, M. L., Stephens, F., Landos, M., Bansemer, M. S., ... & Oxley, A. (2018). The inner workings of the outer surface: skin and gill microbiota as indicators of changing gut health in yellowtail kingfish. Frontiers in microbiology, 8, 2664.	25
Proteobacteria	Alphaproteobacteria	Roseovarius	Skin, Gills	Yellowtail Kingfish (Seriola lalandi)	Saltwater	Elevated in healthy fish	16S sequencing	Legrand, T. P., Catalano, S. R., Wos-Oxley, M. L., Stephens, F., Landos, M., Bansemer, M. S., ... & Oxley, A. (2018). The inner workings of the outer surface: skin and gill microbiota as indicators of changing gut health in yellowtail kingfish. Frontiers in microbiology, 8, 2664.	25
Proteobacteria	Betaproteobacteria	Simplicispira	Skin, Gills	Yellowtail Kingfish (Seriola lalandi)	Saltwater	Elevated in diseased (enteritis) fish	16S sequencing	Legrand, T. P., Catalano, S. R., Wos-Oxley, M. L., Stephens, F., Landos, M., Bansemer, M. S., ... & Oxley, A. (2018). The inner workings of the outer surface: skin and gill microbiota as indicators of changing gut health in yellowtail kingfish. Frontiers in microbiology, 8, 2664.	25
Proteobacteria	Gammaproteobacteria	Shewanella	Whole Body	Mexican Molly (Poecilia sphenops)	Estuarine	Medium-to-high salinity biomarker	16S sequencing of fish across salinities	Schmidt, V. T., Smith, K. F., Melvin, D. W., & Amaral‐Zettler, L. A. (2015). Community assembly of a euryhaline fish microbiome during salinity acclimation. Molecular ecology, 24(10), 2537-2550.	47
Proteobacteria	Gammaproteobacteria	Aeromonas	Whole Body	Mexican Molly (Poecilia sphenops)	Freshwater	Low salinity biomarker	16S sequencing of fish across salinities	Schmidt, V. T., Smith, K. F., Melvin, D. W., & Amaral‐Zettler, L. A. (2015). Community assembly of a euryhaline fish microbiome during salinity acclimation. Molecular ecology, 24(10), 2537-2550.	47
Fusobacteria	Fusobacteriia	Cetobacterium	Whole Body	Mexican Molly (Poecilia sphenops)	Freshwater	Low salinity biomarker	16S sequencing of fish across salinities	Schmidt, V. T., Smith, K. F., Melvin, D. W., & Amaral‐Zettler, L. A. (2015). Community assembly of a euryhaline fish microbiome during salinity acclimation. Molecular ecology, 24(10), 2537-2550.	47
Proteobacteria	Gammaproteobacteria	Vibrio	Whole Body	Mexican Molly (Poecilia sphenops)	Saltwater	High salinity biomarker	16S sequencing of fish across salinities	Schmidt, V. T., Smith, K. F., Melvin, D. W., & Amaral‐Zettler, L. A. (2015). Community assembly of a euryhaline fish microbiome during salinity acclimation. Molecular ecology, 24(10), 2537-2550.	47
